# Supplementary material for: PIC: Comprehensive R package for permafrost indices computing with daily weather observations and atmospheric forcing over the Qinghai–Tibet Plateau
Source: Copernicus journal article supplement (doi:10.5194/gmd-2018-15), 2018-03-06
Supplement: Supplementary file [file gmd-2018-15-AC2-supplement.pdf]

# **“PIC v1.2: Comprehensive R package for permafrost indices computing with daily weather observations and atmospheric forcing over the Qinghai–Tibet Plateau”**

by Lihui Luo et al.

We thank Anonymous Reviewer #1 for the valuable feedback, which helped us to improve the manuscript. Please find below the Reviewer comments in black, [Author responses in green](#), and [Changes to the manuscript in blue](#).

## **Response to reviewer comment 1:**

In this manuscript the authors introduce the "PIC" R-package for computing permafrost indices over the Qinghai-Tibet Plateau (QTP). The package can calculate temperature/depth-related indices to estimate the possible change trends of frozen soil in the QTP, and provides over 10 statistical methods, a sequential Mann-Kendall trend test and spatial trend method to evaluate the permafrost indices. The package also provides multiple visual options to display the temporal and spatial variabilities on the stations and region. Along with the package, a dataset from 52 permanent meteorological stations across the QTP is prepared and the authors use it to demonstrate the temporal-spatial change trends of Tibetan permafrost with the climate.

The manuscript demonstrates some basic usages of PIC package. Although the authors state that the PIC package can be employed for a comprehensive analysis and can be used to validate the simulated results of the region, there's no such application presented in the current manuscript, therefore it's difficult to find the advantages of this package. On the other hand, a reasonable summarizing and categorizing the frozen indices developed in this package would be very useful for permafrost community, it's not available in the current manuscript. Overall, the manuscript is not well written and needs to be better organized. I do not recommend it for publication at the current stage, it could be reconsidered if the following points are addressed.

[Thanks for your insightful comments. In revising the paper, we have carefully considered your comments and suggestions. We agree with your comments on data, parameters, simulation verification, extensibility of the package, and so on. To address these concerns, we make the following modifications to the manuscript: \(1\) Reorganized the manuscript structure; \(2\) Added the preparation of datasets and parameters, and comparative analysis between simulations and observations; \(3\) Modified inappropriate expression; \(4\) Highlighted the importance of the transparency and repeatability in permafrost modeling, especially for the Qinghai-Tibet Plateau; \(5\) Improved the flow of the manuscript language \(Figure R1\). We tried our best to address each of your points in detail. We feel the revision represents an improvement and hope you do also. For more details, please see our replies below.](#)

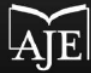

AMERICAN JOURNAL EXPERTS

## EDITORIAL CERTIFICATE

This document certifies that the manuscript listed below was edited for proper English language, grammar, punctuation, spelling, and overall style by one or more of the highly qualified native English speaking editors at American Journal Experts.

### Manuscript title:

PIC v1.2: Comprehensive R package for permafrost indices computing with daily weather observations and atmospheric forcing over the Qinghai–Tibet Plateau

### Authors:

Lihui Luo, Zhongqiong Zhang, Wei Ma, Shuhua Yi, Yanli Zhuang

### Date Issued:

May 4, 2018

### Certificate Verification Key:

0F39-05E1-2A03-E17C-F3E0

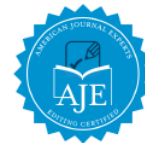

This certificate may be verified at [www.aje.com/certificate](http://www.aje.com/certificate). This document certifies that the manuscript listed above was edited for proper English language, grammar, punctuation, spelling, and overall style by one or more of the highly qualified native English speaking editors at American Journal Experts. Neither the research content nor the authors' intentions were altered in any way during the editing process. Documents receiving this certification should be English-ready for publication; however, the author has the ability to accept or reject our suggestions and changes. To verify the final AJE edited version, please visit our verification page. If you have any questions or concerns about this edited document, please contact American Journal Experts at [support@aje.com](mailto:support@aje.com).

American Journal Experts provides a range of editing, translation and manuscript services for researchers and publishers around the world. Our top-quality PhD editors are all native English speakers from America's top universities. Our editors come from nearly every research field and possess the highest qualifications to edit research manuscripts written by non-native English speakers. For more information about our company, services and partner discounts, please visit [www.aje.com](http://www.aje.com).

Figure R1. Editorial Certificate.

### Specific comments:

1. It's mentioned that GLDAS and the weather station data of the surrounding QTEC were merged to produce a new data set, while it's not clear how this is done.

### The main data processing workflow is as follows:

- (1) Data pre-processing. There are a lot of details to be considered in the pre-processing workflow, such as time conversion, null value, unit conversion, and height correction in different datasets. For time conversion, China Meteorological Administration (CMA) data is based on Beijing time, while Beijing time is 8 hours earlier than time of Global Land Data Assimilation System (GLDAS). So the time of GLDAS data needs to be converted to coincide with CMA time. For height correction, the height of variables of the two datasets is different and needs to be revised according to the corresponding formula.
- (2) Spatial interpolation of GLDAS. Higher spatial resolution data can be obtained through the spatial interpolation, which used bilinear interpolation method to implement spatial downscaling from  $0.25^{\circ}$  of GLDAS to  $0.10^{\circ}$ .
- (3) Spatial interpolation of CMA. Spatial distribution of the CMA data can be obtained through transparent analysis and spatial interpolation of ground-based observations using ANUSPLIN package.
- (4) Offset correction. The higher spatial resolution data was calibrated with correction parameters obtained from differences between the GLDAS data and the CMA data.
- (5) Data post-processing. Post-processing mainly includes files segmentation, data compression, format conversion and so on.

We have updated the sentence as follows:

“The Qinghai-Tibet Engineering Corridor (QTEC), located at the centre of the QTP, was selected in preparing the atmospheric forcing data. Global Land Data Assimilation System (GLDAS, <https://ldas.gsfc.nasa.gov>) and the weather station data of the surrounding QTEC were merged through spatial interpolation and offset correction to produce a new data set for 1980 to 2010 with a daily 0.1° temporal-spatial resolution. An atmospheric forcing dataset was used as the input data for the PIC v1.2 regional calculation.”

2. Please give concrete description on the parameters for the ground conditions, such as thermal conductivity of ground in thawed/frozen states, how were these parameters estimated or retrieved? their typical values and ranges at QTP.

We added the process of preparing the parameters in “3 Data and parameters” section.

“The parameters for the ground conditions were based on soil property data and field observations. The parameter data have two sets: one for weather stations and another for the QTEC region. The Harmonized World Soil Database (HWSD, version 1.21) provides information on soil parameters that are available for evaluating soil thermal conductivity with field observations and can be used as input parameters to the PIC v1.2 package (Bicheron et al., 2008; Nachtergaele et al., 2009). The thermal conductivity of ground in a thawed/frozen state,  $\lambda_t$  and  $\lambda_f$ , can be computed through the joint parameterization scheme of the Johansen method (Johansen, 1977) and Luo parameterization (Luo et al., 2009):

$$\lambda_{dry} = \frac{0.135 \times \rho + 64.7}{2700 - 0.947 \times \rho} \quad (25)$$

$$\lambda_s = \lambda_q^q \times \lambda_o^{1-q} \quad (26)$$

$$\lambda_{sat} = \lambda_s^{1-\theta_s} \times \lambda_w^{\theta_s} \quad (27)$$

$$S_r = \frac{\theta}{\theta_s} \quad (28)$$

$$K_{et} = \frac{K_t \times S_r}{1 + (K_t - 1) \times S_r} \quad (29)$$

$$K_{ef} = \frac{K_f \times S_r}{1 + (K_f - 1) \times S_r} \quad (30)$$

$$\lambda_t = (\lambda_{sat} - \lambda_{dry})K_{et} + \lambda_{dry} \quad (31)$$

$$\lambda_f = (\lambda_{sat} - \lambda_{dry})K_{ef} + \lambda_{dry} \quad (32)$$

where the soil thermal conductivity of dry soil  $\lambda_{dry}$  depends on dry bulk density  $\rho$ , the thermal conductivity of soil solids  $\lambda_s$  varies with the gravel content  $q$ ,  $\lambda_q$  is the thermal conductivity of quartz ( $7.7 \text{ W m}^{-1} \text{ K}^{-1}$ ),  $\lambda_o$  is the thermal conductivity of other minerals ( $2.0 \text{ W m}^{-1} \text{ K}^{-1}$ ), and  $q$  is the gravel content in the soil. The saturated soil thermal conductivity  $\lambda_{sat}$  depends on the thermal conductivity of soil solids  $\lambda_s$ , liquid water  $\lambda_w$  ( $0.594 \text{ W m}^{-1} \text{ K}^{-1}$ ), and the soil saturated water content  $\theta_s$ . The degree of saturation  $S_r$  is a function of the soil water content,  $\theta$  and soil saturated water content,  $\theta_s$ . The Kersten numbers in the thawed/frozen state,  $K_{et}$  and  $K_{ef}$ , are two functions of the degree of saturation  $S_r$ , and  $K$  values in the thawed/frozen state,  $K_t$  and  $K_f$ ;  $\rho$ ,  $q$  and  $\theta_s$  come from the T\_BULK\_DENSITY, T\_GRAVEL, and T\_BS fields of the HWSD.  $\theta$ ,  $K_t$  and  $K_f$  in different soil textures can be found in Table 3. Figure 3 shows these parameters over the QTP.

Table 3: Parameters of thermal conductivity in the thawed/frozen state. The UADS Code came from soil

texture classification of United States Department of Agriculture (USDA). The Qinghai-Tibet Plateau does not have the 1 and 8 of soil classification codes.  $\theta$ : soil water content;  $K_t$ : thermal conductivity of soil solid in thawed state;  $K_f$ : thermal conductivity of soil solid in frozen state.

| USDA Code | Soil Texture    | $\theta$ | $K_t$ | $K_f$ |
|-----------|-----------------|----------|-------|-------|
| 1         | clay(heavy)     | 0.17     | 1.90  | 0.85  |
| 2         | silty clay      | 0.17     | 1.90  | 0.85  |
| 3         | clay (light)    | 0.17     | 1.90  | 0.85  |
| 4         | silty clay loam | 0.17     | 1.90  | 0.85  |
| 5         | clay loam       | 0.17     | 1.90  | 0.85  |
| 6         | silt            | 0.17     | 1.90  | 0.85  |
| 7         | silt loam       | 0.17     | 1.90  | 0.85  |
| 8         | sandy clay      | 0.15     | 3.55  | 0.85  |
| 9         | loam            | 0.15     | 3.55  | 0.95  |
| 10        | sandy clay loam | 0.15     | 3.55  | 0.95  |
| 11        | sandy loam      | 0.15     | 3.55  | 0.95  |
| 12        | loamy sand      | 0.06     | 4.60  | 1.70  |
| 13        | sand            | 0.06     | 4.60  | 1.70  |

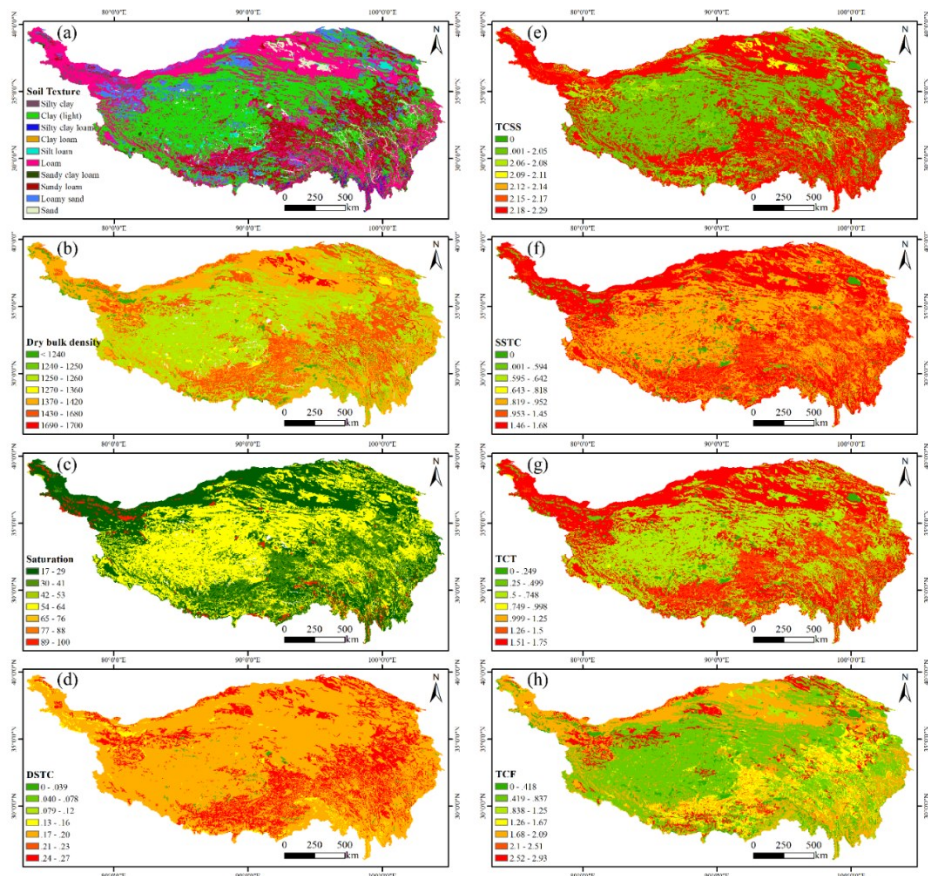

Figure 3: Spatial parameters for PIC v1.2 over the Qinghai-Tibet Plateau. (a) soil texture classification based on HWSO data; (b) dry bulk density  $\rho$ ; (c) soil saturated water content  $\theta_s$ ; (d) thermal conductivity of dry soil  $\lambda_{dry}$ ; (e) thermal conductivity of soil solids  $\lambda_s$ ; (f) saturated soil thermal conductivity  $\lambda_{sat}$ ; (g) thermal conductivity of ground in thawed state  $\lambda_t$ ; (h) thermal conductivity of ground in frozen state  $\lambda_f$ .”

In Discussion section “5.3 Limitations and uncertainties”, we added parameter uncertainties.

“Second, the heterogeneity in ground conditions of the QTP also brings along uncertainties of parameter preparation.”

3. It's mentioned several times that the PIC package integrates meteorological observations, remote sensing data, and field measurements to compute the factors or indices of permafrost and seasonal frozen soil. But from the manuscript, there's no description on how remote sensing data is integrated. It's also mentioned that the package integrates model simulations, it's not clear what model simulations refer to.

The Global Land Data Assimilation System (GLDAS) data and Harmonized World Soil Database (HWSD) came from remote sensing data. The spatial data with GLDAS and weather station data was called the gridded meteorological and soil datasets could be a more precise description. We changed “remote sensing data” to “gridded meteorological and soil datasets”.

Model simulations, in fact, is the operation of the PIC package. We changed “model simulation” to “permafrost modeling” or “permafrost”. In some statements, we still keep “simulation” the word.

4. In Discussion, the authors state the simulation results from the PIC package show widespread permafrost degradation in QTP and the temporal-spatial trends of the permafrost conditions in QTP are consistent with previous studies. While there's no material results presented here to validate or compare with previous published literatures.

The QTEC is the most accessible area of the QTP. Most boreholes were drilled in the QTEC to monitor changes of permafrost conditions, and this monitoring data provides support for model performance evaluation. Figure 7 and 8 provide the temporal-spatial change trends of the permafrost conditions using active layer thickness (ALT), and we added Table 5 to evaluated the PIC v1.2 simulation performance in “5.1 PIC performance”

“Climate change indicates a pronounced warming and permafrost degradation in the QTP with active layer deepening (Chen et al., 2013; Cheng and Wu, 2007b; Wu and Zhang, 2010; Wu et al., 2010), and both the simulation of stations and the region in PIC v1.2 also show widespread permafrost degradation (Figures 4-8). Meanwhile, as shown in Figures 7 & 8, the permafrost in the QTEC also continued to thaw, with the ALT growing. The QTEC is the most accessible area of the QTP. Most boreholes were drilled in the QTEC to monitor changes of permafrost conditions, and this monitoring data provides support for model performance evaluation. Meanwhile, ALT was widely used, so we adopted the permafrost index to estimate PIC v1.2 simulation performance. The simulated PIC v1.2 ALT and previous literature in the QTEC are compared in Table 5. The increasing rate of ALT averaged 0.50-7.50 cm yr<sup>-1</sup>. The rate during the 1990s to 2010s was greater at more than 4.00 cm yr<sup>-1</sup>, than during 1980 to the 1990s, at approximately 2.00 cm yr<sup>-1</sup>. Though both the observed and the simulated ALT and its variation in different locations of the QTEC were still relatively large, the ALT trend in PIC v1.2 was close to the observations and simulation in the QTEC. In recent decades, the permafrost thaw rate has increased significantly. The majority of observed ALT and its trend along the QTH and QTR were greater than the simulated grid ALT of PIC v1.2, mainly because the observation sites are near these engineering facilities. These comparative analyses suggest that the temporal-spatial trends of permafrost conditions in the QTEC using PIC v1.2 were consistent with previous studies. More importantly, the difference between

simulation results highlights the importance of transparency and reusability of models, data, parameters, simulation results and so on.”

Table 5. The active layer thickness (ALT) and its trend between the PIC v1.2 simulation and literature analysis in the Qinghai-Tibet Engineering Corridor (QTEC).

| Mean ALT (m) | ALT Scope (m) | ALT trend (cm yr-1)               | Period    | Location                                                                  | Data sources           |
|--------------|---------------|-----------------------------------|-----------|---------------------------------------------------------------------------|------------------------|
| 2.03         | 0.97-3.87     | 2.89                              | 1980-2010 | The whole QTEC                                                            | PIC v1.2               |
| 2.18         | 1.00-3.20     | 1.33                              | 1981-2010 | Near the Qinghai-Tibet highway along the QTEC                             | Li et al. (2012)       |
| —            | 1.00-3.00     | 0.50-2.00; 3.00-5.00 (1990s-2001) | 1980-2001 | Simulation along the Qinghai-Tibet Highway/Railway                        | Oelke and Zhang (2007) |
| —            | 1.30-3.50     | —                                 | —         | Near the Qinghai-Tibet highway along the QTEC                             | Pang et al. (2009)     |
| —            | 2.00-2.60     | 2.14-7.14                         | 1991-1997 | 1 site (35°43'N, 94°05'E) Near the Qinghai-Tibet highway along the QTEC   | Cheng and Wu (2007a)   |
| —            | 1.84-3.07     | —                                 | 1990s     | 17 Monitoring sites near the Qinghai-Tibet Highway/Railway along the QTEC | Jin et al. (2008)      |
| 2.41         | 1.32-4.57     | 7.50                              | 1995-2007 | 10 Monitoring sites Near the Qinghai-Tibet highway along the QTEC         | Wu and Zhang (2010)    |
| 2.40         | 1.61-3.38     | 4.26                              | 2002-2012 | 10 Monitoring sites (34°49'N, 92°55'E) along the QTEC                     | Wu et al. (2015)       |

5. In Discussion, it's mentioned the spatial modeling at QTEC region classifies land cover and topographic features to determine the input spatial parameters, it's necessary to provide details and rationalities. It's also mentioned that the spatial modeling uses the GLDAS satellite data, but no detailed information.

Please see the our responses “1” and “2” in the Specific comments section.

6. The authors claim the PIC package will serve engineering applications and can be used to assess the impact of climate change on permafrost. Currently the package targets specifically QTP, how's the extensibility of this package? Is it possible to apply or extent the PIC package to other permafrost regions easily? If so, the PIC package will benefit a larger community.

The transparency and repeatability of data, parameters, model codes, computational processes, simulation output, visualization, and statistical analysis is a fundamental principle of scientific researches in the Earth system modeling. At present, there is a lack of open source software for permafrost modeling in the Tibetan plateau. The PIC v1.1 package use commonly used data and parameters, and these



permafrost indices are also applied to other permafrost regions; data and parameters of station calculation support a variety of data formats, while the current spatial data and parameters of region calculation only support NetCDF format, but this format is widely used in the Earth System Modeling community. A total of 52 weather stations with daily meteorological records over the Qinghai-Tibet Plateau (i.e., from 1951 to 2010) were integrated into the PIC package, which was never before. Whether it's data or packages, it can cause broad interest in permafrost communities. In order to ensure that the PIC package can be widely used, although the Qinghai-Tibet Plateau data is the default option, but are not confined to the Qinghai-Tibet Plateau, the invocation of PIC functions take into account the convenience of users. More importantly, these indices can be used separately to make free choices based on the needs of the researchers. Furthermore, we use the GNU-GPL 3.0 license, which other researchers can modify, refine, or integrate the PIC package into other software or Web service. Meanwhile, our team will continue to refine the package to meet a variety of needs.

Below, we will use an example to show the application of external data using PIC package, which came from other permafrost regions.

We used weather station data in northeastern China to compute permafrost indices using PIC package (please see Table R1 & Figure R2). We think that the PIC package can be fully extended to other areas.

Table R1. Station information for Mohe.

| SID   | Station Name | Latitude | Longitude | Elevation | Start date |   | End date |    |
|-------|--------------|----------|-----------|-----------|------------|---|----------|----|
| 50136 | Mohe         | 52°58'   | 122°31'   | 433       | 1958       | 1 | 2000     | 12 |

```

Console Terminal
R/PIC/PIC
> d50136 <- read.csv("d50136.csv", head=TRUE)
> Thawing_index(Year=1999,TempName="Temperature", data=d50136, SID=50136)
1999
2010.3
> Freezing_index(Year=1999,TempName="Temperature", data=d50136, SID=50136)
1999
3534.4
> Thawing_index(Year=1958:2000,TempName="Temperature", data=d50136, SID=50136)
1958 1959 1960 1961 1962 1963 1964 1965 1966 1967 1968 1969 1970 1971 1972 1973
210695.9 12105.3 2054.9 21623.2 2130.9 2102.0 1993.4 1974.1 2070.2 2173.5 2188.9 1979.5 2187.2 2226.0 1932.9 2205.4
1974 1975 1976 1977 1978 1979 1980 1981 1982 1983 1984 1985 1986 1987 1988 1989
2145.6 2249.0 2036.0 2035.4 2032.4 2131.2 2123.6 2056.0 2108.3 2004.9 2146.6 2125.8 2190.0 1988.1 2290.5 2096.3
1990 1991 1992 1993 1994 1995 1996 1997 1998 1999 2000
2244.4 2122.8 2180.2 2196.2 2279.3 2094.0 2172.6 2062.8 2101.0 2010.3 2226.7
> MAAT(Year=2000,TempName="Temperature", data=d50136, SID=50136)
2000
-4.764658
> MAAT(Year=1958:2000,TempName="Temperature", data=d50136, SID=50136)
1958 1959 1960 1961 1962 1963 1964 1965 1966 1967 1968 1969 1970 1971 1972 1973
566.933425 23.547671 -5.811233 48.743288 -4.400000 -3.508767 -4.954247 -6.135890 -5.914247 -3.418904 -4.035342 -6.117534 -4.705753
1971 1972 1973 1974 1975 1976 1977 1978 1979 1980 1981 1982 1983
-3.907945 -6.199178 -4.261096 -5.489315 -3.258356 -5.561918 -5.204932 -4.122466 -5.057808 -4.707397 -4.264110 -3.826849 -3.760000
1984 1985 1986 1987 1988 1989 1990 1991 1992 1993 1994 1995 1996
-4.809589 -4.567397 -3.541370 -5.457808 -2.777534 -3.229589 -2.814795 -4.012603 -3.942740 -3.227123 -3.582740 -3.076438 -4.433699
1997 1998 1999 2000
-3.846301 -3.602274 -4.175616 -4.764658
> |
  
```

Figure R2. The computing process using PIC package. In this example, 1958 years of data quality is not good, because the missing value too much.

We added some sentences in Abstract and Discussion sections.

“The transparency and repeatability of the PIC v1.2 package and its data can be used and extended to assess the impact of climate change on permafrost.”

“Moreover, the regional calculation can extend from QTEC to the entire QTP and even the other permafrost regions.”

Minor comments:

1. P2, L13: Change "Such an increase. . ." to "Such an increase in temperature of QTP. . ."

This has been corrected, thank you.

2. P2, L14-15: Add "Understanding" before "The distribution and changes of permafrost with climate. . .".

This has been corrected, thank you.

3. P3, L4: Change "depends on the size of" to "depends on the magnitude of"

This has been corrected, thank you.

4. P3, L15: Change "with" to "at".

This has been corrected, thank you.

5. P3, L16: Change "These indices consist. . ." to "The permafrost indices consist. . ."

This has been corrected, thank you.

6. P3, L19: Change "multi-dimensional simulation" to "multi-dimensional permafrost simulation"

This has been corrected, thank you.

7. P3, L21: Be more concise on the problem.

We modified these sentence below.

“The transparency and repeatability of data, parameters, model codes, computational processes, simulation output, visualization, and statistical analysis is a fundamental principle of scientific research in Earth system modelling. At present, there is a lack of open source software, shared data and parameters for permafrost modelling in the QTP.”

8. P3, L23: Change "the current condition" to "the current situation".

This has been corrected, thank you.

9. P3, L25: I doubt the word "determine" used here.

This has been corrected, thank you.

We have updated the sentence as follows:

“The goal is to provide guidance for the future of highway and high-speed railway design and construction in the QTP, as well as to further understand the effects of climate change on permafrost



dynamics.”

10. P5, L5: Change "function" to "functions".

This has been corrected, thank you.

11. P5, L6: Change "max and min" to "maximal and minimal".

This has been corrected, thank you.

12. P5, L14-20: The signs of equations from (3) to (6) are not consistent with equations (7) and (8).

We checked these equations.

13. P5, L21: Add "defined" before "in".

This has been corrected, thank you. For a clearer description of MAGT, we rewrote the sentence as follows:

“MAGT is defined as the soil temperature at the depth of zero annual temperature change.  $T_{z,t}$  is the ground temperature at any time  $t$  and depth  $z$  below a ground surface. MAGT is often found at the depths from 10 m to 16 m over the QTP (Wu and Zhang, 2010). Here, we take the  $z$  value of 15 meters.”

14. P8, L3: Please add a proper citation to R.

we have added the following as a reference to the manuscript:

R Core Team: R: A Language and Environment for Statistical Computing, R Foundation for Statistical Computing, Vienna, Austria, <http://www.R-project.org/>, 2017.

15. P8, L5: Change "functionality" to "functionalities".

This has been corrected, thank you.

16. P12, L9-10: What does "based on the 52 observation stations" mean? What index is used to detect the permafrost here?

Using Exist\_Permafrost function to detect the probability of permafrost occurrence. This has been corrected, thank you. We have updated the sentence as follows:

“The PIC v1.2 simulation results using the Exist\_Permafrost function show that permafrost was detected at 12 of the 52 observation stations (Figure 4)”

17. P12, L11: Why does ALT decrease here?

Sorry. Wrong writing. Thanks for pointing this out. Have been modified to “increasing ALT”.

“The permafrost, whether in permafrost stations or QTEC, continued to thaw with increasing ALT, low surface offset and thermal offset, and high MAAT, MAGST, MAGT, and TTOP for most areas of QTP.”

18. P13, L8-11: It’s better to mention that you’re discussing technical implementation here. It will be more informative by giving the specification of the computer used to run the performance tests.

PIC v1.2 was run natively as a single process in Windows 7 Operating system. The calculations were performed independently through RStudio Desktop v1.1 software (RStudio, Inc., USA). The utilized processor type is Intel Core i7-2600 CPU 3.40GHz, and the available memory is 32 GB.

“The “for” loop is discarded, whereas the “apply” functions are used extensively to significantly lower the computation time. PIC v1.2 was run natively as a single process in the Windows 7 Operating system. The calculations were performed independently through RStudio Desktop v1.1 software (RStudio, Inc., USA). The utilized processor is an Intel Core i7-2600 CPU 3.40 GHz, and the available memory is 32 GB. The current regional calculation takes only approximately 11 s. Apart from the Kudryavtsev model that requires considerable computation time (i.e., approximately 5 min), the station calculation also exhibited an improved efficiency. Therefore, PIC v1.2 can be considered an efficient R package.”

19. P13, L14-15: The point (2) is not clear.

MAGT is soil temperature at the depth of zero annual temperature change, which is often found at the depth from 10-16 m on the QTP. Regression analysis shows that MAGT on the QTP has the relationship as equation (R1-R3):

$$\text{MAGT} = -0.83\varphi - 0.0049E + 50.63341 \quad (\text{R1})$$

$$\text{MAGT} = 68.827 - 0.00827E - 0.927\varphi \quad (\text{R2})$$

$$\text{MAGT} = 65.461 - 1.222\varphi - 0.005E - 0.299\cos\theta \quad (\text{R3})$$

Where  $\varphi$ , E and  $\theta$  represents latitude, elevation and aspect respectively.

We have updated the sentence as follows:

“(2) constructed a regression analysis method through the relationship between MAGT and elevation, latitude, and slope-aspects that presented a static permafrost distribution (Lu et al., 2013; Nan, 2005).”

20. P14, L1: Change "approximately" to "partially".

This has been corrected, thank you.

21. P14, L19: Please describe how the soil input parameters are handled in PIC directly.

Please see the our responses “2” in the Specific comments section (above).

22. Table 1: The units of thermal conductivity usually are written as "W m-1 K-1".

This has been corrected, thank you.

## References:

- Bicheron, P., Defourny, P., Brockmann, C., Schouten, L., Vancutsem, C., Huc, M., Bontemps, S., Leroy, M., Achard, F., and Herold, M.: GLOBCOVER: products description and validation report, *Foro Mundial De La Salud*, 17, 285-287, 2008.
- Chen, H., Zhu, Q. A., Peng, C. H., Wu, N., Wang, Y. F., Fang, X. Q., Gao, Y. H., Zhu, D., Yang, G., Tian, J. Q., Kang, X. M., Piao, S. L., Ouyang, H., Xiang, W. H., Luo, Z. B., Jiang, H., Song, X. Z., Zhang, Y., Yu, G. R., Zhao, X. Q., Gong, P., Yao, T. D., and Wu, J. H.: The impacts of climate change and human activities on biogeochemical cycles on the Qinghai-Tibetan Plateau, *Global Change Biol*, 19, 2940-2955, 2013.
- Cheng, G. and Wu, T.: Responses of permafrost to climate change and their environmental significance, Qinghai-Tibet Plateau, *J Geophys Res-Earth*, 112, 2007a.
- Cheng, G. D. and Wu, T. H.: Responses of permafrost to climate change and their environmental significance, Qinghai-Tibet Plateau, *J Geophys Res-Earth*, 112, 2007b.
- Jin, H., Yu, Q., Wang, S., and Lü, L.: Changes in permafrost environments along the Qinghai-Tibet engineering corridor induced by anthropogenic activities and climate warming, *Cold Reg Sci Technol*, 53, 317-333, 2008.
- Johansen, O.: *Thermal Conductivity of Soils*, 1977. University of Trondheim, Norway, 1977.
- Li, R., Zhao, L., Ding, Y., Wu, T., Xiao, Y., Du, E., Liu, G., and Qiao, Y.: Temporal and spatial variations of the active layer along the Qinghai-Tibet Highway in a permafrost region, *Chin Sci Bull*, 57, 4609-4616, 2012.
- Luo, S., Lü, S., and Zhang, Y.: Development and validation of the frozen soil parameterization scheme in Common Land Model, *Cold Reg Sci Technol*, 55, 130-140, 2009.
- Nachtergaele, F., Velthuisen, H. V., Verelst, L., Batjes, N., Dijkshoorn, K., Engelen, V. V., Fischer, G., Jones, A., Montanarella, L., and Petri, M.: *Harmonized World Soil Database*, 2009, 34-37 (Published on DVD).
- Oelke, C. and Zhang, T.: Modeling the Active-Layer Depth over the Tibetan Plateau, *Arct Antarct Alp Res*, 39, 714-722, 2007.
- Pang, Q., Cheng, G., Li, S., and Zhang, W.: Active layer thickness calculation over the Qinghai-Tibet Plateau, *Cold Reg Sci Technol*, 57, 23-28, 2009.
- Wu, Q., Hou, Y., Yun, H., and Liu, Y.: Changes in active-layer thickness and near-surface permafrost between 2002 and 2012 in alpine ecosystems, Qinghai-Xizang (Tibet) Plateau, China, *GPC*, 124, 149-155, 2015.
- Wu, Q. B. and Zhang, T. J.: Changes in active layer thickness over the Qinghai-Tibetan Plateau from 1995 to 2007, *J Geophys Res-Atmos*, 115, 2010.
- Wu, Q. B., Zhang, T. J., and Liu, Y. Z.: Permafrost temperatures and thickness on the Qinghai-Tibet Plateau, *GPC*, 72, 32-38, 2010.

PIC v1.2: Comprehensive R package for permafrost indices computing with daily weather observations and atmospheric forcing over the Qinghai-Tibet Plateau

Lihui Luo<sup>1</sup>, Zhongqiong Zhang<sup>1</sup>, Wei Ma<sup>1</sup>, Shuhua Yi<sup>2</sup>, Yanli Zhuang<sup>3</sup>

<sup>1</sup>State Key Laboratory of Frozen Soils Engineering, Cold and Arid Regions Environmental and Engineering Research Institute, Chinese Academy of Sciences, Lanzhou, Gansu Province 730000, China

<sup>2</sup>State Key Laboratory of Cryospheric Sciences, Cold and Arid Regions Environmental and Engineering Research Institute, Chinese Academy of Sciences, Lanzhou, Gansu Province 730000, China

<sup>3</sup>Linze Inland River Basin Research Station, Key Laboratory of Inland River Basin Ecohydrology, Cold and Arid Regions Environmental and Engineering Research Institute, Chinese Academy of Sciences, Lanzhou, Gansu Province 730000, China

Correspondence to: Lihui Luo (luoh@lzb.ac.cn)

**Abstract.** An R-package permafrost indices computing (PIC)- v1.2 R package was developed, which that integrates meteorological observations, remote sensing data, gridded meteorological datasets, soil databases, and field measurements to compute the factors or indices of permafrost and seasonal frozen soil. At present, 16 temperature/depth-related indices are integrated into the PIC v1.2 R package PIC to estimate the possible change-trends of frozen soil in the Qinghai-Tibet Plateau (QTP). These indices include the mean annual air temperature; (MAAT), mean annual ground surface temperature; (MAGST), mean annual ground temperature; (MAGT), seasonal thawing/freezing n factor ( $n_t/n_f$ ), thawing/freezing degree-days  $\theta$  for air and the ground surface (DDT<sub>a</sub>/DDT<sub>g</sub>/DDF<sub>a</sub>/DDF<sub>g</sub>), temperature at the top of the permafrost; (TTOP), active layer thickness; (ALT), and maximum seasonal freeze depth. The PIC package v1.2 supports two computational modes, namely, the stations and region calculation regional calculations that enables enable statistical analysis and intuitive visualization on of the time series and spatial simulations. Over Data sets of 52 weather stations and a central region of the QTP were prepared and simulated to evaluate the temporal-spatial trends of permafrost with the climate. More than 10 statistical methods and a sequential Mann-Kendall trend test were adopted to evaluate these indices in stations, and a sequential Mann-Kendall trend test and spatial trend

样式定义: 批注文字: 字体: (默认) Tahoma, 8 磅, 左

带格式的: 字体颜色: 文字 1

带格式的: 字体颜色: 文字 1

带格式的: 下标

带格式的: 下标

带格式的: 下标

带格式的: 下标

带格式的: 下标

带格式的: 下标

~~methods~~spatial methods were adopted: ~~to determine the spatial trends~~. Multiple visual manners ~~were used to~~ display the temporal and spatial ~~variabilities on~~variability of the stations and region. ~~The data sets of 52 weather stations and a central region of QTP were prepared and simulated to evaluate the temporal spatial change trends of permafrost with the climate~~. Simulation results show extensive permafrost degradation in ~~the~~ QTP, and the temporal—spatial trends of the permafrost conditions in ~~the~~ QTP ~~were consistent with~~are close to those of previous studies. ~~The transparency and repeatability of the PIC v1.2 package will serve engineering applications and and its data~~ can be used ~~and extended~~ to assess the impact of climate change on permafrost.

带格式的: 字体颜色: 文字 1, 英语(美国), 图案: 清除 (白色)

## 1 Introduction

Permafrost, which is soil, rock, or sediment with temperatures that have remained at or below 0 °C for at least two ~~consecutive~~ years, is a key component of the cryosphere. The upper layer in permafrost regions is called the active layer, ~~which and it~~ undergoes seasonal freezing and thawing. Below this layer lies permafrost, the upper surface of which is called the upper ~~limit of~~permafrost, ~~limit or the~~ permafrost table. Changes in permafrost can affect water and heat ~~exchanges, exchange, the~~ carbon ~~budgets~~budget, and natural hazards with ~~the~~ climate change. Permafrost occurs mostly in high latitudes and altitudes with long, cold winters and ~~thin~~thick winter snow ~~cover (~~e.g., the Arctic, Antarctica, Alaska, ~~the Alps~~, Northern Russia, Northern Canada, Northern Mongolia, and the Qinghai—Tibet Plateau (QTP)) (Riseborough et al., 2008; Yi et al., ~~2014b~~2014a; Zhang et al., 2008a). Over half of the QTP ~~land~~ is underlain by permafrost (~~Ran et al., 2012~~)(Ran et al., 2012). The temperature in ~~the~~ QTP has increased by ~~more than~~ 0.25 °C per decade over the past 50 years (Li et al., 2010; ~~Liu~~Ran et al., ~~2006~~2018; Shen et al., 2015; Yao et al., 2007). Climate-induced warming of the near-surface atmospheric layer and a corresponding increase in ground temperatures will lead to substantial changes in the water and energy balance of regions underlain by permafrost (Hilbich et al., 2008). Such an increase ~~in the temperature of the QTP~~ can warm the ground through energy exchange at the surface and result in significant permafrost degradation. ~~The~~Understanding the distribution and changes of permafrost ~~with~~under the influence of climate ~~change~~ is necessary for infrastructure development, ecological and

带格式的: 英语(英国)

带格式的: 英语(英国), 图案: 清除

带格式的: 英语(英国)

带格式的: 英语(英国)

带格式的: 字体颜色: 自动设置, 图案: 清除

environmental ~~assessments~~assessment, and climate system ~~modeling~~modelling (Luo et al., 2017; Luo et al., 2012; Zhang et al., 2014).

Given the possibility of future climate warming, an evaluation of the magnitude of changes in the ground thermal regime has become desirable to assess the possible eco-environmental ~~responses~~response and ~~their~~the impact on ~~the~~QTP infrastructure in

带格式的: 英语(英国)

QTP. Permafrost ~~modeling~~modelling maximizes quantitative ~~methods, such as~~ analytical, numerical, or empirical methods, to predict the thermal condition of the ground in environments where permafrost may be present (Harris et al., 2009; Lewkowicz and Bonnaventure, 2008; Riseborough, 2011; Riseborough et al., 2008; Yi et al., ~~2014a~~2014b; Zhang et al., 2008b). At present, dozens of different factors or indices are used to evaluate the characteristics and dynamics of permafrost presence or absence (Riseborough, 2011; Riseborough et al., 2008), including ~~the~~ freezing/thawing index, mean annual air temperature (MAAT),

带格式的: 英语(英国)

mean annual ground temperature (MAGT), mean annual ground surface temperature (MAGST), temperature at the top of permafrost (TTOP), and ~~the~~ active layer thickness (ALT); ~~among others~~). Thereafter, the type and distribution of frozen soil can be classified in a variety of manners depending on the ~~index sizes~~range and magnitude ~~of these indices~~. For example, frozen soil can be divided into highly stable, stable, substable, transitional, unstable, and extremely unstable permafrost, as well as seasonal frozen soil that depends on the ~~sizes~~magnitude of MAGT (Chen et al., 2012; Ran et al., 2012). These indices

can be used to evaluate and predict the temporal and spatial variation in the thermal response of permafrost to the changing ~~climate~~climatic conditions and properties of Earth's surface and subsurface ~~properties~~ in one, two, or three dimensions (Juliussen and Humlum, 2007; Nelson et al., 1997; Riseborough et al., 2008; Wu et al., 2010; Zhang et al., 2005). Accordingly,

successfully summarizing and categorizing a variety of frozen-soil indices ~~require~~requires permafrost ~~modeling~~modelling that concerns analytical, numerical, and empirical methodologies to compute the past and present ~~condition of~~ permafrost conditions. The Stefan solution (~~Nelson et al., 1997~~)(Nelson et al., 1997), Kudryavtsev's approach (Kudryavtsev et al., 1977), ~~the~~ TTOP model (~~Smith and Riseborough, 1996~~), and (~~Smith and Riseborough, 1996~~), and ~~the~~ Geophysical

带格式的: 英语(英国)

Institute Permafrost Lab model (Romanovsky and Osterkamp, 1997; Sazonova and Romanovsky, 2003) are several important developments for permafrost ~~modeling~~modelling in recent years. Permafrost is a subsurface feature that is difficult to directly



observe and map. These methods integrate the effects of air and ground temperatures, topography, vegetation, and soil properties to map permafrost spatially and explicitly (Gisnås et al., 2013; Jafarov et al., 2012; Zhang et al., 2014). Weather observation data, including air and soil temperatures ~~withat~~ different depths, are the main inputs for single-point simulation, ~~whereas the spatial and temporal resolution of the atmospheric forcing dataset is the main input data of permafrost spatial~~ modelling. These permafrost indices consist mainly of temperature-related and depth-related indices. The temperature-related indices depict the status of air or land surface temperature in frozen-soil environments, whereas the depth-related indices reveal the status of the active layer. Preparing atmospheric forcing ~~data-sets~~, snow depth and density, vegetation types, and soil ~~classes-are-generally-required-for-multi-dimensional-simulation,-which-came~~ class data sets from multi-source data fusion, particularly remote sensing and ground observation data is generally required for multi-dimensional permafrost simulation.

The ~~current~~ transparency and repeatability of data, parameters, model codes, computational processes, simulation output, visualization, and statistical analysis is a fundamental principle of scientific research in Earth system modelling. At present, there is a lack of open source software-on, shared data and parameters for permafrost modeling-over-modelling in the QTP-is a problem. Although many scientists in China have field data and models on hand, ~~the~~ their integration ~~of data-and-models~~ into a new open source model can facilitate the deepening of the discussion and unfolding of permafrost research on the QTP.

Given the current ~~condition~~ situation of permafrost ~~modeling~~ modelling in the QTP, a comprehensive R package of permafrost indices computing (PIC v1.2, doi: 10.5281/zenodo.1237428) was developed to compute permafrost and seasonal frozen-soil indices- (Luo, 2018). The goal is to ~~determine the solutions to maintain or build the engineers in a manner that provides-provide~~ guidance for the future of highway and high-speed railway design and construction in the QTP, as well as to further understand the effects of climate change on ~~the~~ permafrost dynamics ~~over~~ QTP. Therefore, the proposed software integrates meteorological observations, ~~remote-sensing-data~~ gridded meteorological datasets, soil databases, field measurements, and permafrost modelling.

带格式的: 英语(英国)

带格式的: 字体: Times New Roman, 字体颜色: 文字 1

带格式的: 图案: 清除 (白色)

带格式的: 图案: 清除 (白色)

带格式的: 英语(英国)

带格式的: 英语(英国)

2 Package description

2.1 Overview

PIC v1.2 was developed in the R language and environment for statistical computing v. 3.3.3 and is distributed as open source software under the GNU-GPL 3.0 License (R Core Team, 2017). Therefore, the PIC v1.2 code can be modified as required to meet the needs of every user. The source code can be downloaded from the GitHub repository (<https://github.com/iffylaw/PIC>). The R package PIC v1.2 provides all the necessary functionality to perform the calculation, statistics, and drawing of permafrost indices with over 38 functions based on the user's specific requirements (see Figure 2). The following packages are required in setting up PIC v1.2 (type library(PIC)): ggplot2 (Wickham et al., 2009), ggmap (Kahle and Wickham, 2013), RNetCDF (Michna and Woods, 2013), and animation (Xie, 2013). These packages are automatically added to the R users' library during installation. A data set that contains the daily weather observations, parameters, and information (i.e., from 1951 to 2010) of 52 weather stations in the QTP was bundled into this package. However, the regional data with the NetCDF format was placed in the GitHub repository. The data set variables excluded in the calculation can also be used as reference or provide support to further develop PIC. These variables include wind speed, precipitation, evaporation, humidity, and soil temperature at different depths. PIC v1.2 was primarily designed to compute indices of permafrost and seasonal frozen soil from observations and forcing data. Therefore, the current stable version of the program (v 1.1) includes functionalities that cover temperature-related indices (i.e., MAAT, MAGST, and TTOP) and depth-related indices (i.e., ALT and FD) that are commonly used in permafrost research model. It is possible to evaluate the changes in frozen soil better by combining multiple indices for overall analysis.

PIC v1.2 supports two computational modes: the station and regional calculations that enable statistical analysis and visual displays of the time series and spatial simulations. The regional calculation adopts GIS approaches to compute each spatial grid. PIC v1.2 was initially developed to address the immediate need for a reliable and easy-to-use program for estimating temporal-spatial changes in frozen QTP soil. Thus, the workflow is comprised of deliberately simplified steps throughout the entire process. Once PIC v1.2 is installed, the workflow of the weather observations is considerably straightforward: (1) an

带格式的: 无弧行控制

带格式的: 图案: 清除 (白色)

index of a weather station for one year or multiple years is calculated, (2) an index of 52 weather stations from 1951 to 2010 is calculated, and (3) an index of all stations or permafrost stations from 1951 to 2010 is drawn through a curve and spatial visualization. Step (1) is an optional step. The forcing data workflow has only two steps: (1) a total of 4 indices from 1980 to 2010 are calculated, including MAAT,  $DDT_{\theta}$ ,  $DDF_{\theta}$ , and ALT and (2) the spatial statistics and visualization of these 4 indices are drawn.

The remainder of this paper is organized as follows. Section 2 describes the prepared data sets, methodology of permafrost modeling, and statistical methods for stations and region. Section 3 presents a detailed description of the functions provided by PIC and the workflow. Section 4 demonstrates the application of the proposed software for the stations and region. Section 5 discusses several benefits and limitations of PIC. Lastly, Section 6 presents the conclusions.

## 2 Data and Methods

### 2.1 Data and parameters

**Daily weather observations.** Meteorological data were obtained from the China Meteorological Administration (CMA, <http://www.cma.gov.cn/>), particularly from permanent meteorological stations across QTP. A total of 52 weather stations with daily meteorological records (i.e., from 1951 to 2010) were selected, including the daily mean, maximum (max) and minimum (min) air temperatures, wind speed, observed and corrected precipitation, evaporation, air humidity, atmospheric pressure, sunshine duration, daily mean, max and min ground surface temperatures, and soil temperature with different depths (i.e., 5, 10, 15, 20, 40, 50, 80, 160, and 320 cm). These data have been corrected under specification for surface meteorological observation and quality control of CMA.

**Atmospheric forcing data set.** The QT Engineering Corridor (QTEC), which is located at the center of QTP, was selected in preparing the atmospheric forcing data. Global Land Data Assimilation System (GLDAS, <https://ldas.gsfc.nasa.gov>) and the weather station data of the surrounding QTEC were merged to produce a new data set for 1980 to 2010 with a daily  $0.1^{\circ}$  temporal-spatial resolution (Rui and Beaudoin, 2011).

带格式的: 字体: Times New Roman, 字体颜色: 文字 1, 图案: 清除 (白色)

**Parameters.** The parameters for the ground conditions were prepared based on vegetation and soil classification (Bicheron et al., 2008; Nachtergaele et al., 2009), field observations, and topographic maps. The parameter data have two data sets: one for weather stations and another for the QTEC region. Table 1 and Figure 1 show the detailed information of the data and parameters.

## 2.2 Permafrost modeling

The PIC package v1.2 enables the calculation of the thawing/freezing degree-days for air and ground surface ( $DDT_a/DDT_s/DDF_a/DDF_s$ ), MAAT, MAGST, MAGT, the seasonal thawing/freezing  $n$  factor ( $n_s/n_f$ ), thawing/freezing degree-days of air and ground surface ( $DDT_a/DDT_s/DDF_a/DDF_s$ ), TTOP, ALT, and the maximum seasonal freeze depth (FD). These permafrost and seasonal frozen-soil indices that employ the following functions are illustrated. Table 1 describes most of them.

$A_s$  is the annual temperature amplitude at the ground surface, where  $T_{max}$  and  $T_{min}$  are the annual maximal and minimal temperatures, respectively, at the ground surface.  $A_s$  can be calculated as follows:

$$A_s = T_{max} - T_{min} \quad (1)$$

$L$  is the volumetric latent heat of fusion,  $\rho$  is the dry density of soil, and  $W$  is the water content of the soil in percentages.

$$L = \frac{80 \times \rho \times W}{100} \quad (2)$$

$DDT_a$  and  $DDT_s$  are the thawing degree-day sums of the mean daily air and ground surface above temperatures  $0^\circ\text{C}$  (Celsius degree-days), respectively.  $DDF_a$  and  $DDF_s$  are the freezing degree-day sums of the mean daily air and ground surface temperatures below  $0^\circ\text{C}$  (Celsius degree-days), respectively. Degree-days are usually used to describe the air and ground surface temperature intensity, where  $T_a$  and  $T_s$  are the air and ground temperatures, respectively, and  $n$  is the number of days in a year (Juliussen and Humlum, 2007) (Juliussen and Humlum, 2007).

$$DDT_a = \sum_{i=1}^n T_a, T_a > 0 \quad (3)$$

$$DDF_a = \sum_{i=1}^n T_a, T_a < 0 \quad (4)$$

带格式的: 英语(英国)

带格式的: 英语(英国)

带格式的: 英语(英国)

带格式的: 英语(英国)

带格式的: 英语(英国)

带格式的: 英语(英国)

带格式的: 字体颜色: 文字 1

带格式的: 字体颜色: 文字 1, 英语(英国)

带格式的: 字体颜色: 文字 1

带格式的: 字体颜色: 文字 1

带格式的: 英语(英国)

带格式的: 英语(英国)

带格式的: 英语(英国)

带格式的: 英语(英国)

带格式的: 英语(英国)

带格式的: 英语(英国)

$$DDT_s = \sum_{i=1}^n T_{s,i}, T_s > 0 \quad (5)$$

$$DDF_s = \sum_{i=1}^n T_{s,i}, T_s < 0 \quad (6)$$

$P$  is assigned a value of 365 days. Local variations in vegetation, topography, and snow cover may result in several differences between MAGST and MAAT. MAAT and MAGST can be computed as follows:

$$MAAT = \frac{DDT_a - DDF_a}{P} \quad (7)$$

$$MAGST = \frac{DDT_s - DDF_s}{P} \quad (8)$$

MAGT is defined as the soil temperature in (Wu and Zhang, 2010) at the depth of zero annual temperature change.  $T_{z,t}$  is the ground temperature at any time  $t$  and depth  $z$  below a ground surface. MAGT is often found at depths from 10 m to 16 m over the QTP (Wu and Zhang, 2010). Here, we take the  $z$  value of 15 metres. MAGT can be computed (Juliussen and Humlum, 2007; Riseborough et al., 2008) as follows:

$$T_{z,t} = \overline{T}_a + A_s \times e^{-z \times \sqrt{\pi/\alpha P}} \times \sin\left(\frac{2\pi t}{P} - z \times \sqrt{\pi/\alpha P}\right) \quad (9)$$

$$MAGT = \overline{T}_{z,t}, z \cong 15 \text{ \& } t = 86400 \quad (10)$$

The seasonal thawing/freezing  $n$  factor ( $n_t/n_f$ ) relates thawing and freezing degree-days ( $DDT_d/DDT_d/DDF_d/DDF_d$ ) in seasonal air temperature to ground surface temperatures.  $n_t$  and  $n_f$  can be computed (Riseborough et al., 2008) as follows:

$$n_t = \frac{DDT_s}{DDT_a} \quad (11)$$

$$n_f = \frac{DDF_s}{DDF_a} \quad (12)$$

TTOP indicates average temperatures at the top of the permafrost. The active layer is defined as the layer of ground subject to annual thawing and freezing underlain by permafrost. ALT refers to the maximum thawing depth of the active layer. Two methods serve the same purpose when computing TTOP and ALT. The subscripts  $S$  and  $K$  stand for the Smith and Kudryavtsev functions (Kudryavtsev et al., 1977; Smith and Riseborough, 1996), respectively.

$$TTOP_S = \frac{n_t \times \lambda_t \times DDT_a - n_f \times \lambda_f \times DDT_s}{\lambda_f \times P} \quad (13)$$

带格式的: 英语(英国)

带格式的: 字体颜色: 文字 1

带格式的: 字体颜色: 文字 1

带格式的: 字体颜色: 文字 1

带格式的: 英语(英国)

带格式的: 英语(英国)

$$TTOP_K = \frac{0.5 \times MAGST \times (\lambda_t + \lambda_f) + A_s \times \frac{\lambda_f - \lambda_t}{\pi} \times \left[ \frac{MAGST}{A_s} \times \arcsin \frac{MAGST}{A_s} + \sqrt{1 - \frac{\pi^2}{A_s^2}} \right]}{\lambda^*} \quad (14)$$

$$\lambda^* = \begin{cases} \lambda_f, & \text{if numerator} < 0 \\ \lambda_t, & \text{if numerator} > 0 \end{cases} \quad (15)$$

The maximum thawing depth or ALT uses the Stefan and Kudryavtsev functions (Kudryavtsev et al., 1977; Riseborough et al., 2008), where  $L$  is the latent heat of fusion ~~eff~~or ice ( $3.34 \times 10^5$  J/kg).

$$ALT_S = \sqrt{\frac{2 \times \lambda_t \times DD T_d}{L \times \rho \times (W - W_u)}} \quad (16)$$

$$A_z = \frac{A_s - T_z}{\ln \left[ \frac{A_s + L/2 \times C_T}{T_z + L/2 \times C_T} \right]} - \frac{L}{2 \times C_T} \quad (17)$$

$$Z_c = \frac{2 \times (A_s - T_z) \times \sqrt{\frac{(\lambda_f + \lambda_t) \times P_{sn} \times C_T}{2 \times \pi}}}{2 \times A_z \times C_T + L} \quad (18)$$

$$ALT_K = \frac{2 \times (A_s - TTOP_K) \times \sqrt{\frac{(\lambda_f + \lambda_t) \times P_{sn} \times C_T}{2 \times \pi}} + \frac{(2 \times A_z \times C_T \times Z_c - L \times Z_c) \times L \times \sqrt{\frac{(\lambda_f + \lambda_t) \times P_{sn}}{2 \times \pi \times C_T}}}{2 \times A_z \times C_T \times Z_c + L \times Z_c + (2 \times A_z \times C_T + L) \times \sqrt{\frac{(\lambda_f + \lambda_t) \times P_{sn}}{2 \times \pi \times C_T}}}}{2 \times A_z \times C_T + L} \quad (19)$$

$Freeze\_depth_s$  is the maximum seasonal freezing depth that uses the Stefan function, which can be computed as follows:

$$Freeze\_depth_s = \sqrt{\frac{2 \times \lambda_t \times DD F_d}{L \times \rho \times (W - W_u)}} \quad (20)$$

### 2.3 Statistical methods

Statistical analysis can facilitate the evaluation of the ~~change~~-trend and the overall ~~modelling performance of the model simulation~~. In particular, each statistic has strengths and weaknesses; ~~thus~~, Thus, we adopted over 10 statistical methods to evaluate these indices in station computing for time series data. The quantitative statistics include the slope, y-intercept, Pearson's correlation coefficient ( $R$ ), coefficient of determination ( $R^2$ ), root mean square error (RMSE), standard deviation (SD), ratio of scatter (RS), normalized RMSE (NRMSE), Nash–Sutcliffe efficiency (NSE), RMSE-observations standard deviation ratio (RSR), percent bias (PBIAS), normalized average error (NAE), variance ratio (VR), and index of agreement ( $D$ ) (Jafarov et al., 2012; Legates and McCabe, 1999). The sequential Mann-Kendall (MK) trend test was used to statistically



assess whether there was a shift in trends of the climate factors and permafrost indices (Fraile, 1993). The original MK trend test can be calculated as follows:

$$S = \sum_{i=1}^{n-1} \sum_{j=i+1}^n \text{sign}(x_j - x_i), (i = 2, 3, 4 \dots n) \quad (21)$$

$$\text{sign}(x_j - x_i) = \begin{cases} 1 & \text{if } x_j - x_i > 0 \\ 0 & \text{if } x_j - x_i = 0 \\ -1 & \text{if } x_j - x_i < 0 \end{cases} \quad (22)$$

Two sequential series  $u_i$  values can be calculated as follows:

$$u_i = \frac{S_i - E(S_i)}{\sqrt{\text{Var}(S_i)}}, (i = 1, 2, 3 \dots n) \quad (23)$$

value can be calculated as follows:

$$u_i = \frac{S_i - E(S_i)}{\sqrt{\text{Var}(S_i)}}, (i = 1, 2, 3 \dots n) \quad (23)$$

The two series for the MK trend test, a progressive one- and a backward-one, were set up. If they cross each other and diverge beyond a specific threshold value and exceed the confidence level of 95%, then there is a statistically significant trend shift point.

The spatial trend can also be calculated to evaluate regional computing for temporal-spatial data through the function below.

The index represents one permafrost index,  $n$  represents the sequential years, and  $index_i$  is the index value in year  $i$ .

Taking ALT as an example, a positive trend means that ALT was increasing, thereby indicating that permafrost degradation has intensified; a negative value means that ALT was decreasing, thereby indicating that permafrost degradation has a certain inhibition; and a zero trend suggests a lack of change (Chen et al., 2014; Stow et al., 2003).

$$\text{Trend} = \frac{n \times \sum_{i=1}^n i \times index_i - \sum_{i=1}^n i \times \sum_{i=1}^n index_i}{n \times \sum_{i=1}^n i^2 - (\sum_{i=1}^n i)^2} \quad (24)$$

value means that ALT was increasing, thereby indicating that permafrost degradation has intensified; a negative value means that ALT was decreasing, thereby indicating that permafrost degradation has a certain inhibition; and a zero trend suggests a lack of change (Chen et al., 2014; Stow et al., 2003).

$$\text{Trend} = \frac{n \times \sum_{i=1}^n i \times index_i - \sum_{i=1}^n i \times \sum_{i=1}^n index_i}{n \times \sum_{i=1}^n i^2 - (\sum_{i=1}^n i)^2} \quad (24)$$

3 Package description

PIC was developed in the R Language Data and Environment for Statistical Computing v. 3.3.3 and is distributed as open source software under the GNU GPL 3.0 License. Therefore, the PIC code can be modified as required to meet the needs of every user. The source code can be downloaded at the GitHub repository (<https://github.com/iffylaw/PIC>). The R package PIC provides all the necessary functionality to perform the calculation, statistics, and drawing of permafrost indices with over 38 functions based on the user's specific requirements (see Figure 2). The following packages are required in setting up the PIC (type library(PIC)): ggplot2 (Wickham et al., 2009), ggmap (Kahle and Wickham, 2013), RNetCDF (Michna and Woods, 2013); (Zambrano-Bigiarini and Rojas, 2013), and animation (Xie, 2013). These packages are automatically added to the users' R library during installation. A data set that contains the daily weather observations, parameters, and information (i.e., from 1951 to 2010) of 52 weather stations in QTP were bundled into this package. However, the region data with the NetCDF format was placed in the GitHub repository. The data set variables excluded in the calculation can be used as reference or provide support to further develop PIC. These variables include wind speed, precipitation, evaporation, humidity, and soil temperature at different depths. PIC was primarily designed to compute indices of permafrost and seasonal frozen soil from observations and forcing data. Therefore, the current stable version of the program (v 1.0) includes functionalities that cover temperature-related indices (i.e., parameters MAAT, MAGST, and TTOP) and depth-related indices (i.e., ALT and FD) that are commonly used in permafrost research.

3.1 Daily weather observations

Table 2 shows detailed information of the data and parameters. Meteorological data were obtained from the China Meteorological Administration (CMA, <http://www.cma.gov.cn/>), particularly from permanent meteorological stations across the QTP (Figure 1). A total of 52 weather stations with daily meteorological records (i.e., from 1951 to 2010) were selected, including the daily mean, maximum (max) and minimum (min) air temperatures, wind speed, observed and corrected precipitation, evaporation, air humidity, atmospheric pressure, sunshine duration, daily mean, max and min ground surface temperatures, and soil temperature at different depths (i.e., 5, 10, 15, 20, 40, 50, 80, 160, and 320 cm). The PIC package supports two computational modes: the station and region calculations that enable statistical analysis and visual displays on the time series and spatial simulations. The regional calculation adopts GIS approaches to compute each spatial grid. PIC was initially developed to address an immediate need for a reliable and easy-to-use program to estimate the temporal-spatial

带格式的: 标题 1, 段落间距段前: 24 磅, 段后: 12 磅, 行距: 单倍行距

带格式的: 字体颜色: 黑色, 英语(英国), 字距调整三号, 图案: 清

带格式的: 字体颜色: 黑色, 英语(英国), 字距调整三号, 图案: 清

changes in frozen soil in QTP. Thus, the workflow comprises deliberately simplified steps involved throughout the entire process. Once PIC is installed, the workflow of the weather observations is considerably straightforward: (1) an index of a weather station for one year or multiple years is calculated, (2) an index of 52 weather stations from 1951 to 2010 is calculated, and (3) an index of all stations or permafrost stations from 1951 to 2010 is drawn through curve and spatial visualization.

These data have been corrected under specifications for surface meteorological observation and CMA quality control. Daily weather observations are used as the input data for the PIC v1.2 station calculation.

### 3.2 Atmospheric forcing dataset

The Qinghai-Tibet Engineering Corridor (QTEC), located at the centre of the QTP, was selected in preparing the atmospheric forcing data. Global Land Data Assimilation System (GLDAS, <https://ldas.gsfc.nasa.gov>) and the weather station data of the surrounding QTEC were merged through spatial interpolation and offset correction to produce a new data set for 1980 to 2010 with a daily 0.1° temporal-spatial resolution. An atmospheric forcing dataset was used as the input data for the PIC v1.2 regional calculation.

### 3.3 Parameters

The parameters for the ground conditions were based on soil property data and field observations. The parameter data have two sets: one for weather stations and another for the QTEC region. The Harmonized World Soil Database (HWSD, version 1.21) provides information on soil parameters that are available for evaluating soil thermal conductivity with field observations and can be used as input parameters to the PIC v1.2 package (Bicheron et al., 2008; Nachtergaele et al., 2009). The thermal conductivity of ground in a thawed/frozen state,  $\lambda_t$  and  $\lambda_f$ , can be computed through the joint parameterization scheme of the Johansen method (Johansen, 1977) and Luo parameterization (Luo et al., 2009):

$$\lambda_{dry} = \frac{0.135 \times \rho + 64.7}{2700 - 0.947 \times \rho} \quad (25)$$

$$\lambda_s = \lambda_q^q \times \lambda_o^{1-q} \quad (26)$$

$$\lambda_{sat} = \lambda_s^{1-\theta_s} \times \lambda_w^{\theta_s} \quad (27)$$

$$S_r = \frac{\theta}{\theta_s} \quad (28)$$

$$K_{et} = \frac{K_t \times S_r}{1 + (K_t - 1) \times S_r} \quad (29)$$

$$K_{ef} = \frac{K_f \times S_r}{1 + (K_f - 1) \times S_r} \quad (30)$$

$$\lambda_t = (\lambda_{sat} - \lambda_{dry}) K_{et} + \lambda_{dry} \quad (31)$$

$$\lambda_f = (\lambda_{sat} - \lambda_{dry}) K_{ef} + \lambda_{dry} \quad (32)$$

where the soil thermal conductivity of dry soil  $\lambda_{dry}$  depends on dry bulk density  $\rho$ , the thermal conductivity of soil solids  $\lambda_s$  varies with the gravel content  $q$ ,  $\lambda_q$  is the thermal conductivity of quartz ( $7.7 \text{ W m}^{-1} \text{ K}^{-1}$ ),  $\lambda_o$  is the thermal conductivity of other minerals ( $2.0 \text{ W m}^{-1} \text{ K}^{-1}$ ), and  $q$  is the gravel content in the soil. The saturated soil thermal conductivity  $\lambda_{sat}$  depends on the thermal conductivity of soil solids  $\lambda_s$ , liquid water  $\lambda_w$  ( $0.594 \text{ W m}^{-1} \text{ K}^{-1}$ ), and the soil saturated water content  $\theta_s$ . The degree of saturation  $S_r$  is a function of the soil water content,  $\theta$ , and soil saturated water content,  $\theta_s$ . The Kersten numbers in the thawed/frozen state,  $K_{et}$  and  $K_{ef}$ , are two functions of the degree of saturation  $S_r$ , and  $K$  values in the thawed/frozen state,  $K_t$  and  $K_f$ .  $\rho$ ,  $q$  and  $\theta_s$  come from the T\_BULK\_DENSITY, T\_GRAVEL, and T\_BS fields of the HWSD.  $\theta$ ,  $K_t$  and  $K_f$  in different soil textures can be found in Table 3. Figure 3 shows these parameters over the QTP.

#### 4 Implementation

~~Step (1) is an optional step.~~ The workflow of the forcing data has only two steps: (1) a total of 4 indices from 1980 to 2010 are calculated, including MAAT,  $DDT_w$ ,  $DDF_w$ , and ALT and (2) the spatial statistic and visualization of these 4 indices are drawn. Table 2 describes most of these functions.

#### 4 Examples

Several examples of the PIC v1.2 use and application ~~were~~are presented here. This section highlights several significant features of the package in terms of specific functions, including station and ~~region~~regional calculation, statistics, and visualization. However, PIC v1.2 includes numerous illustrations from ~~the~~ literature and possible detailed analyses. PIC v1.2

has built-in station data. The data set comprises two tables (data frame), namely, QTP\_ATM for daily weather observations and Station\_Info for information and parameters ~~infrom~~ each station. Users can modify or adjust the parameters in the Station\_Info and ~~ean~~ use the data and parameters. Additional examples can be referenced in the GitHub repository: [https://github.com/iffylaw/PIC/blob/master/](https://github.com/iffylaw/PIC/blob/master/Examples.R)

[Examples.R](#).

#### 4.1 Station calculation

We can use different functions in the R console to perform the calculations based on the selected method. For example, if a user wants to obtain a MAAT value for a certain ~~year of a station, then year~~, he/she can enter the following command.

TempName and data are optional in the MAAT function.

```
MAAT (Year = 1980, TempName = "Temperature", data = QTP_ATM, SID = 52908)
```

~~User~~A user can also obtain the MAAT values for a specified period of years in a station.

```
MAAT (Year = 1980:2010, TempName = "Temperature," data = QTP_ATM, SID = 52908)
```

The "Year" option can be assigned to a number and sequence. The other temperature/depth-related indices can also use the two inputs for the "Year" option. A user can obtain the values of all stations for an index. The "VarName" option can be equal to the function name in the Com\_Indices\_QTP function. The results can also be saved to a CSV file with column/row names.

The case of the input VarName is supported.

```
Com_Indices_QTP (VarName = "MAAT")
```

Given that the freezing/thawing index can be divided into freezing/thawing degree-days of the air and ground surface, the VarName option should add "\_air" or "\_ground" at the ~~endends~~ of the Freezing\_index and Thawing\_index. However, the abbreviation can also be utilized as the option input. The "Thawing\_index\_air" and "ta" are the same.

```
Com_Indices_QTP (VarName = "Thawing_index_air")
```

```
Com_Indices_QTP (VarName = "ta")
```

After the TTOP indices are computed, the stations that may have permafrost should be determined. The Exist\_Permafrost

**带格式的:** 字体: 加粗, 字距调整二号

**带格式的:** 英语(英国)

function can determine and map the stations where permafrost exists. The probability of permafrost occurrence and most likely permafrost conditions are determined from the computing results of the Exist\_Permafrost function (see Figure 34).

```
TTOP_S_QTP <- Com_Indices_QTP (VarName = "TTOP_Smith")  
TTOP_K_QTP <- Com_Indices_QTP (VarName = "TTOP_Kudryavtsev")  
Exist_Permafrost (plot = "yes")
```

The QTP measurements have constantly been difficult. The data set has several null and anomalous values, as well as ~~lead~~leading to a few anomalous values in computing the indices. Accordingly, these outlier values should be processed. The

5 Outlier\_Process function seeks the outlier values and sets ~~these values them~~ to null-values thereafter, which is an option because abnormal values have been processed in the Com\_Indices\_QTP.

```
Outlier_Process (MAAT_QTP[,1:stations])
```

4.2 ~~Region~~Regional calculation

A total of four indices, including MAAT, DDF<sub>a</sub>, DDT<sub>a</sub> and ALT, can be computed with the atmospheric forcing data set in the PIC packagev1.2. This package supports the-NetCDF format data; thus, the-packageit reads and writes a NetCDF file to support ~~region~~regional computing. The input NetCDF files require a few forcing and parameter data. After the calculations, a user can compute the spatial statistics and draw the index changes through a GIF animation (see Sections 4.3 and 4.4).

10 ~~region~~regional computing. The input NetCDF files require a few forcing and parameter data. After the calculations, a user can

```
Spatial_Pic (NetCDFName = "PIC_indices.nc", StartYear = 1980, EndYear = 2010)
```

4.3 Statistics

The stat function contains all, the statistical methods for station calculation. The-PIC packagev1.2 provides two statistical calculations to-compute-for computing the statistical valuevalues of all stations using Com\_Stats\_QTP: (1) the indices that vary with the change in the yearchanging years and (2) the comparison of the same two indices for different computational methods. Options ind1 and ind2 were used; however, ind2 can be disregarded when computing the statistical values between, a single ~~data~~datum and years.

15 with the change in the yearchanging years and (2) the comparison of the same two indices for different computational methods.

Options ind1 and ind2 were used; however, ind2 can be disregarded when computing the statistical values between, a single ~~data~~datum and years.

带格式的: 英语(英国)

带格式的: 英语(英国)

带格式的: 英语(英国)

带格式的: 英语(英国)



```
Com_Stats_QTP (ind1 = MAAT_QTP)
```

TTOP and ALT were calculated utilizing two different functions, so these two indices should be compared. For example, the two TTOP values for all QTP stations of QTP are compared. A user can assign ind1 and ind2 to compute the ALT statistical values between the Stefan and Kudryavtsev functions. Thereafter, the statistical values are saved to the CSV file when executing the Com\_Stats\_QTP function. Table 34 shows all the statistical values of the selected stations.

```
Com_Stats_QTP (ind1 = TTOP_S_QTP, ind2 = TTOP_K_QTP)
Com_Stats_QTP (ind1 = ALT_S_QTP, ind2 = ALT_K_QTP)
```

5 A spatial trend can also be computed using the Spatial\_Stat function after the regional calculation. The function simultaneously saves the spatial trend of the five indices into the NetCDF file. In addition, the function draws the animation of the spatial trend (see Section 4.4).

```
Spatial_Stat ("PIC_indices.nc", "ALT")
```

4.4 Visualization

10 Station visualization can be produced by Plot\_TTOP\_ALT and Plot\_3M. The Plot\_TTOP\_ALT function plots two TTOP or two ALT indices in a figure for all stations or stations with permafrost. VarName has the "TTOP" and "ALT" options, whereas SID has the "permafrost" and "all" options. The Plot\_3M function draws the MAAT, MAGST, and MAGT indices. The two functions plot only plot thesethe stations where permafrost exists when SID = "permafrost."

```
Plot_TTOP_ALT (VarName = "TTOP", SID = "permafrost")
Plot_TTOP_ALT (VarName = "ALT", SID = "permafrost")
Plot_3M(SID = "permafrost")
```

The other approach of "ggplot2" was adopted to visualize the region (see Figure 45).

```
ggplot_Pic (Type = "TTOP", SID = "permafrost")
```

The indices that change over time can also be plotted through a GIF animation that uses Map\_Pic (Figure 56).

```
Map_Pic (VarName = "TTOP_S")
```

```
Map_Pic (VarName = "TTOP_K")
```

The input and output of the regional calculation can be drawn using the Netcdf\_Multiplot function (see Figure 6); the Netcdf\_Animation function7), which uses animation to display these values. The spatial trend can also be drawn in the Spatial\_Stat apart from calculating the spatial statistics. This function draws all four indices when "VarName" has no input (see Figure 78).

```
Netcdf_Multiplot (NetCDFName = "PIC_indices.nc", VarName = "ALT")
```

```
Netcdf_Animation (NetCDFName = "PIC_indices.nc", VarName = "ALT")
```

```
Spatial_Stat ("PIC_indices.nc")
```

5 5 Discussion

5.1 PIC performance

This study proposes permafrost modeling to compute the changes in the active layer and permafrost with the climate, whichand this considers the station and region modelingregional modelling over the QTP. We apply the two approaches to 52 weather stations and a central region of the QTP. The PIC v1.2 simulation results fromusing the 52 stationsExist Permafrost function show that permafrost was detected at 12 stations-based onof the 52 observation stations. For QTEC, the (Figure 4). The permafrost areas began to shrink from the southern and northern parts to the central QTEC region- (Figure 7). The permafrost, whether in permafrost stations or QTEC, continued to thaw with decreasingincreasing ALT, low surface offset and thermal offset, and high MAAT, MAGST, MAGT, and TTOP for most areas of QTP.

The PIC packagev1.2 computes and maps the temporal dynamics and spatial distribution of permafrost in the stations and region. The regional modelingmodelling underwent more challenges than the stations' input data and parameters. The station calculation can estimate the long-term temporal trend of the permafrost dynamics, whereas the regional calculation can estimate the temporal-spatial trend. Climate change indicates a pronounced warming and permafrost degradation in QTP

带格式的: 字体颜色: 自动设置, 英语(英国)

带格式的: 英语(英国)

带格式的: 字体颜色: 自动设置, 英语(英国)

(Chen et al., 2013; Cheng and Wu, 2007; Wu and Zhang, 2010; Wu et al., 2010). The simulation results show widespread permafrost degradation in QTP, and the temporal-spatial trends of the permafrost conditions in QTP were consistent with those in previous studies (Wu and Zhang, 2010; Wu et al., 2010). In addition, the simulated TTOP and ALT that uses using the Stefan and Smith functions haveare higher TTOP and ALT than the Kudryavtsev function. Although the overall trend of TTOP and ALT are coincidental, the two different computational methods can be combined to simulate their variationsvariation. Furthermore, 16 indices can be collectively employed for a comprehensive analysis. Moreover, the station and region modelingregional modelling can be integrated to evaluate the temporal-spatial evolution of permafrost in the QTP. In particular, the station modelingmodelling can be applied to validate the simulated results of the region. Moreover, the regional calculation can extend from QTEC to the entire QTP and even the other permafrost regions.

The “for” loop is discarded, whereas the “apply” functions are used extensively to significantly lower the computation time. The current regional calculation only takes PIC v1.2 was run natively as a single process in the Windows 7 Operating system. The calculations were performed independently through RStudio Desktop v1.1 software (RStudio, Inc., USA). The utilized processor is an Intel Core i7-2600 CPU 3.40 GHz, and the available memory is 32 GB. The current regional calculation takes only approximately 11 s. Apart from the Kudryavtsev model that requires considerable computation time (i.e., approximately 5 min), the station calculation also exhibited an improved efficiency. Therefore, PIC v1.2 can be considered an efficient R package.

Climate change indicates a pronounced warming and permafrost degradation in the QTP with active layer deepening (Chen et al., 2013; Cheng and Wu, 2007b; Wu and Zhang, 2010; Wu et al., 2010), and both the simulation of stations and the region in PIC v1.2 also show widespread permafrost degradation (Figures 4-8). Meanwhile, as shown in Figures 7 & 8, the permafrost in the QTEC also continued to thaw, with the ALT growing. The QTEC is the most accessible area of the QTP. Most boreholes were drilled in the QTEC to monitor changes of permafrost conditions, and this monitoring data provides support for model performance evaluation. Meanwhile, ALT was widely used, so we adopted the permafrost index to estimate PIC v1.2 simulation performance. The simulated PIC v1.2 ALT and previous literature in the QTEC are compared in Table 5. The

带格式的: 英语(英国)

带格式的: 字体颜色: 自动设置, 英语(英国)

带格式的: 字体颜色: 文字 1

带格式的: 字体颜色: 文字 1

带格式的: 字体颜色: 文字 1

increasing rate of ALT averaged 0.50-7.50 cm yr<sup>-1</sup>. The rate during the 1990s to 2010s was greater at more than 4.00 cm yr<sup>-1</sup>, than during 1980 to the 1990s, at approximately 2.00 cm yr<sup>-1</sup>. Though both the observed and the simulated ALT and its variation in different locations of the QTEC were still relatively large, the ALT trend in PIC v1.2 was close to the observations and simulation in the QTEC. In recent decades, the permafrost thaw rate has increased significantly. The majority of observed ALT and its trend along the QTH and QTR were greater than the simulated grid ALT of PIC v1.2, mainly because the observation sites are near these engineering facilities. These comparative analyses suggest that the temporal-spatial trends of permafrost conditions in the QTEC using PIC v1.2 were consistent with previous studies. More importantly, the difference between simulation results highlights the importance of transparency and reusability of models, data, parameters, simulation results and so on.

## 5.2 Advantages

Previous studies ~~in on~~ the QTP (1) used one or two indices, such as MAAT and MAGST, to evaluate the permafrost changes (Yang et al., 2010); ~~(2) presented a static permafrost distribution that, (2)~~ constructed a regression analysis method through the relationship between MAGT and elevation, latitude, and slope-aspects ~~that presented a static permafrost distribution~~ (Lu et al., 2013; Nan, 2005; Yin et al., 2017); and, (3) did not share the model data and codes; hence, other researchers could not validate their results and conduct further ~~study-based-on-previous-research-results~~ (McNutt, 2014). Compared with the previous permafrost ~~modeling-in-modelling on the QTP, the~~ PIC ~~package~~v1.2 is considerably open, easy, intuitive, and reproducible ~~in for~~ integrating data and most of the temperature/depth-related indices. The PIC ~~v1.2~~ function supports the computation of multiple indices and different time periods, and the encoding mode is reusable and universal. This package can also be easily adopted to intuitively display the changes in the active layer and permafrost, as well as assess the impact of climate change.

The PIC ~~v1.2~~ workflow is extremely simple and requires only one or two steps to obtain the simulated results and visual images. All running examples, data and code can be obtained from the GitHub repository. However, the permafrost ~~modelingmodelling~~ integrates ~~satellite remote sensing dataa gridded meteorological dataset, soil database,~~ weather and field observations, parameters, and multiple functions and models, ~~and supportsupporting~~ dynamic ~~change-of-parameters-parameter~~

带格式的: 字体颜色: 文字 1

带格式的: 字体颜色: 文字 1

~~changes~~ such as vegetation and ground condition changes. Over 50 ~~QTP~~ weather stations ~~of QTP~~ were introduced, ~~which and~~ ~~they~~ can ~~approximately~~~~partially~~ resolve the spatial change ~~directions~~ of the permafrost area. The QTEC region is an example of spatial ~~modeling~~, ~~which~~~~modelling that~~ classifies land cover and topographic features to determine the ~~input~~-spatial ~~input~~ parameters. Spatial ~~modeling~~~~modelling~~ also uses the ~~GLDAS-satellite~~~~temporal-spatial~~ data to provide ~~spatially~~ detailed information of the active layer and permafrost. The static/dynamic maps and statistical values of these indices can facilitate the understanding of the current condition of the near-surface permafrost and identify stations and ranges at ~~considerably~~ high risk of permafrost thawing with the changing climate and human activities. Permafrost thawing causes significant changes in the environment and characteristics of frozen-soil engineering (Larsen et al., 2008; Niu et al., 2016). A comprehensive assessment of permafrost can provide guidance regarding the future of highways and high-speed railway systems in ~~the~~ QTP.

### 5.3 Limitations and uncertainties

PIC ~~v1.2~~ was developed with numerous indices, as well as support station and regional simulation. ~~The~~ PIC ~~package~~~~v1.2~~ can be used to estimate the frozen soil status and possible changes over ~~the~~ QTP by calculating permafrost indices. This package has many engineering applications and can be used to assess the impact of climate change on permafrost. Moreover, ~~this package~~~~it~~ provides ~~observation~~~~observational~~ data and ~~provides the ability of a~~ comprehensive analysis ~~through~~~~ability for~~ multiple indices. The probability of permafrost occurrence and ~~the~~ most likely permafrost conditions are determined by computing the 16 indices. Although PIC ~~v1.2~~ quantitatively integrates most of ~~these indices~~~~them~~ based on previous studies (Jafarov et al., 2012; Nelson et al., 1997; Riseborough et al., 2008; Smith and Riseborough, 2010; Wu et al., 2010; Zhang et al., 2005; Zhang et al., 2014), it still has several limitations- ~~and uncertainties~~. First, the regional calculation is one-dimensional and assumes that each grid cell is uniform without ~~the~~ water-heat exchange. Second, ~~the heterogeneity in ground conditions of the QTP also brings along uncertainties of parameter preparation. Third,~~ soil moisture ~~changes~~ at different depths ~~affected~~~~affects~~ the thermal conductivity and thermal capacity of the soil (Shanley and Chalmers, 1999; Yi et al., 2007); ~~thus,~~ ~~Thus,~~ the soil input parameters should be dynamically changed. Lastly, climate forcing has several uncertainties (~~Zhang et al., 2014~~)(Zhang et al., 2014), including input air and ground temperatures (i.e., the quality of the ground temperature in ~~the~~ QTP

带格式的: 英语(英国)

带格式的: 英语(英国)

带格式的: 英语(英国)

带格式的: 英语(英国)

is currently unreliable); ~~thus~~. Thus, the regional calculation supports fewer indices than the station calculation. These deficiencies can be significant for the permafrost dynamics with environmental evolution.

## 6. Conclusions

An R package PIC [v1.2](#) that computes the temperature/depth-related permafrost indices with daily weather observations and ~~climate~~atmospheric forcing has been developed. This package is open source software and can be easily used with input data and parameters, ~~and that~~ users can customize ~~their own data and parameters~~. A total of 16 permafrost indices for stations and ~~the region~~ are ~~currently~~developed, and datasets of 52 weather stations and a central region of the QTP were prepared. Permafrost modelling and data are integrated into the PIC [v1.2](#) R package ~~PIC to simulate the temporal-spatial trends of permafrost with the climate estimate and~~ estimate the status of the active layer and permafrost in ~~the~~ QTP. The current functionalities also include time-series statistics, spatial statistics, and visualization. Multiple visual manners display the temporal and spatial variability ~~on~~of the stations and ~~the~~ region. The package produces high-quality graphics that illustrate the status of frozen soil and may be used for subsequent publication in scientific journals and reports. ~~The data sets of the 52 weather stations and a central region of QTP were prepared and simulated to evaluate the temporal-spatial change trends of permafrost with the climate.~~ The simulated PIC [v1.2](#) results generally indicate that the temporal-spatial trends of permafrost conditions essentially agree with previously published studies. ~~The~~The transparency and repeatability of the PIC [v1.2](#) package ~~has many engineering applications and~~and its data can be used to assess the impact of climate change on permafrost. Additional features may be implemented in future releases of PIC to broaden its application range. In the future, the ~~observation~~observational data of the active layer will be integrated into the PIC ~~data set~~datasets, and the ~~outputs~~simulation results will be compared with ~~the observation data. The~~it. PIC ~~package can~~[v1.2](#) will also be used to predict the future state of permafrost by utilizing projected climate forcing and scenarios. Additional functions and models will be absorbed into PIC to improve the simulation ~~performance~~ and perform comparative analyses with other functions and models. Parallel computation will be added to ~~the PIC package to~~improve the computation efficiency. The key impact that PIC [v1.2](#) is expected to provide

带格式的: 英语(英国)

带格式的: 英语(英国)

带格式的: 英语(英国)

ento the open community is an increase in consistency within, and comparability among, studies. Furthermore, we encourage contributions from other scientists and developers, including suggestions and assistance, to modify and improve the proposed PIC packagev1.2.

带格式的: 字体颜色: 自动设置, 图案: 清除

Code availability

5 The PIC v1.2 code that supportsupports the findings of this study is stored withinin the GitHub repository (<https://github.com/iffylaw/PIC>).

Data availability

The data isare included in the Supplement files or GitHub repository.

Competing interests

10 The authors declare no competing financial interests.

Acknowledgments

Acknowledgements

This research was supported by the National Natural Science Foundation of China (41301508, 41630636). We would like to express our gratitude to the editors and anonymous reviewers for suggestions that improved this paper.

15 References

Bicheron, P., Defourny, P., Brockmann, C., Schouten, L., Vancutsem, C., Huc, M., Bontemps, S., Leroy, M., Achard, F., and Herold, M.: GLOBCOVER: products description and validation report, Foro Mundial De La Salud, 17, 285-287, 2008.  
Chen, B. X., Zhang, X. Z., Tao, J., Wu, J. S., Wang, J. S., Shi, P. L., Zhang, Y. J., and Yu, C. Q.: The impact of climate change and anthropogenic activities on alpine grassland over the Qinghai-Tibet Plateau, Agrieultural andAgr, Forest MeteorologyMeteorol,

带格式的: 缩进: 左侧: 0 厘米, 首行缩进: 0 字符

带格式的: 字体: Calibri

带格式的: 字体: Calibri

带格式的: 字体: Calibri

189, 11-18, 2014.

Chen, H., Zhu, Q. A., Peng, C. H., Wu, N., Wang, Y. F., Fang, X. Q., Gao, Y. H., Zhu, D., Yang, G., Tian, J. Q., Kang, X. M., Piao, S. L., Ouyang, H., Xiang, W. H., Luo, Z. B., Jiang, H., Song, X. Z., Zhang, Y., Yu, G. R., Zhao, X. Q., Gong, P., Yao, T. D., and Wu, J. H.: The impacts of climate change and human activities on biogeochemical cycles on the Qinghai-Tibetan Plateau, *Global Change Biol*, 19, 2940-2955, 2013.

Chen, S., Liu, W., Qin, X. Y., Liu, Y., Zhang, T., Chen, K., Hu, F., Ren, J., and Qin, D.: Response characteristics of vegetation and soil environment to permafrost degradation in the upstream regions of the Shule River Basin, *Environmental Research Letters*~~Environ Res Lett~~, 7, 045406, 2012.

Cheng, G. and Wu, T.: Responses of permafrost to climate change and their environmental significance, *Qinghai-Tibet Plateau, J Geophys Res-Earth*, 112, 2007a.

Cheng, G. D. and Wu, T. H.: Responses of permafrost to climate change and their environmental significance, *Qinghai-Tibet Plateau, J Geophys Res-Earth*, 112, 2007b.

Fraile, R.: On the statistical analysis of series of observations, *Atmos Res*, 29, 274, 1993.

Gisnås, K., Etzelmüller, B., Farbrøt, H., Schuler, T. V., and Westermann, S.: CryoGRID 1.0: Permafrost Distribution in Norway estimated by a Spatial Numerical Model, *Permafrost and Periglacial Processes*~~Periglac~~, 24, 2-19, 2013.

Harris, C., Arenson, L. U., Christiansen, H. H., Etzemüller, B., Frauenfelder, R., Gruber, S., Haeberli, W., Hauck, C., Holzle, M., Humlum, O., Isaksen, K., Kaab, A., Kern-Lutschg, M. A., Lehnig, M., Matsuoka, N., Murton, J. B., Nozli, J., Phillips, M., Ross, N., Seppala, M., Springman, S. M., and Muhl, D. V.: Permafrost and climate in Europe: Monitoring and modelling thermal, geomorphological and geotechnical responses, *Earth-Sci Rev*, 92, 117-171, 2009.

Hilbich, C., Hauck, C., Hoelzle, M., Scherler, M., Schudel, L., Voelksch, I., Muehl, D. V., and Maeusbacher, R.: Monitoring mountain permafrost evolution using electrical resistivity tomography: A 7-year study of seasonal, annual, and long-term variations at Schilthorn, Swiss Alps, *Journal of Geophysical Research*~~J Geophys Res-Earth~~, 113, 2008.

Jafarov, E. E., Marchenko, S. S., and Romanovsky, V. E.: Numerical modeling of permafrost dynamics in Alaska using a high spatial resolution dataset, *Cryosphere*, 6, 613-624, 2012.

Jin, H., Yu, Q., Wang, S., and Lü, L.: Changes in permafrost environments along the Qinghai-Tibet engineering corridor induced by anthropogenic activities and climate warming, *Cold Reg Sci Technol*, 53, 317-333, 2008.

Johansen, O.: *Thermal Conductivity of Soils*, 1977. University of Trondheim, Norway, 1977.

Juliusen, H. and Humlum, O.: Towards a TTOP ground temperature model for mountainous terrain in central-eastern Norway, *Permafrost and Periglacial Processes*~~Periglac~~, 18, 161-184, 2007.

Kahle, D. and Wickham, H.: ggmap: Spatial Visualization with ggplot2, *R J*, 5, 144-161, 2013.

Kudryavtsev, V. A., Garagulya, L. S., Yeva, K. A. K., and Melamed, V. G.: *Fundamentals of Frost Forecasting in Geological Engineering Investigations (Osnovy Merzlotnogo Prognoza pri Inzhenerno-Geologicheskikh Issledovaniyakh)*, 1977. 1977.

Larsen, P. H., Goldsmith, S., Smith, O., Wilson, M. L., Strzepek, K., Chinowsky, P., and Saylor, B.: Estimating future costs for Alaska public infrastructure at risk from climate change, *Global Environ Chang*, 18, 442-457, 2008.

Legates, D. R. and McCabe, G. J.: Evaluating the use of "goodness-of-fit" measures in hydrologic and hydroclimatic model

带格式的: 字体: Calibri

带格式的: 字体: Calibri

带格式的: 缩进: 左侧: 0 厘米, 首行缩进: 0 字符

带格式的: 字体: Calibri

带格式的: 字体: Calibri

带格式的: 字体: Calibri

带格式的: 字体: Calibri

带格式的: 缩进: 左侧: 0 厘米, 首行缩进: 0 字符

带格式的: 字体: Calibri



validation, *Water Resour Res*, 35, 233-241, 1999.

Lewkowicz, A. G. and Bonnaventure, P. R.: Interchangeability of mountain permafrost probability models, northwest Canada, *Permafrost and Periglacial Processes*~~Periglac~~, 19, 49-62, 2008.

Li, L., Yang, S., Wang, Z. Y., Zhu, X. D., and Tang, H. Y.: Evidence of Warming and Wetting Climate over the Qinghai-Tibet Plateau, *Aretic, Antaretic, and Alpine Research*~~Arct Antarct Alp Res~~, 42, 449-457, 2010.

Li, R., Zhao, L., Ding, Y., Wu, T., Xiao, Y., Du, E., Liu, X. D., Yin, Z. Y., Shao, X. M., and Qin, N. S. Qiao, Y.: Temporal trends and variability spatial variations of daily maximum the active layer along the Qinghai-Tibet Highway in a permafrost region, *Chin Sci Bull*, 57, 4609-4616, 2012.

Lu, J., Niu, F., Cheng, H., Lin, Z., Liu, H., and minimum, extreme temperature events, Luo, J.: The Permafrost Distribution Model and growing season length over the eastern and central Tibetan Plateau during 1961-2003, *Journal Its Change Trend of Geophysieal Research*, 111, 2006 *Qinghai-Tibet Engineering Corridor*, *J Mt Sci-Engl*, 31, 226-233, 2013.

Luo, L.: PIC v1.2: Comprehensive R package for permafrost indices computing. Zenodo, 2018.

Luo, L., Ma, W., Zhang, Z., Zhuang, Y., Zhang, Y., Yang, J., Cao, X., Liang, S., and Mu, Y.: Freeze/Thaw-Induced Deformation Monitoring and Assessment of the Slope in Permafrost Based on Terrestrial Laser Scanner and GNSS, *Remote Sens*~~Basel~~, 9, 198, 2017.

Luo, L., Zhang, Y., and Zhu, W.: E-Science application of wireless sensor networks in eco-hydrological monitoring in the Heihe River basin, China, *IET Science, Measurement & Technology*~~Iet Sci Meas Technol~~, 6, 432, 2012.

Luo, S., Lü, S., and Zhang, Y.: Development and validation of the frozen soil parameterization scheme in Common Land Model, *Cold Reg Sci Technol*, 55, 130-140, 2009.

McNutt, M.: Journals unite for reproducibility, *Science*, 346, 679-679, 2014.

Michna, P. and Woods, M.: RNetCDF - A Package for Reading and Writing NetCDF Datasets, *R J*, 5, 29-36, 2013.

Nachtergaele, F., Velthuisen, H. V., Verelst, L., Batjes, N., Dijkshoorn, K., Engelen, V. V., Fischer, G., Jones, A., Montanarella, L., and Petri, M.: Harmonized World Soil Database, 2009, 34-37 (Published on DVD).

Nan, Z.: Prediction of permafrost distribution on the Qinghai-Tibet Plateau in the next 50 and 100 years, *Seienee in Sci*~~China~~ *Series Ser*~~D~~, 48, 797, 2005.

Nelson, F. E., Shiklomanov, N. I., Mueller, G. R., Hinkel, K. M., Walker, D. A., and Bockheim, J. G.: Estimating active-layer thickness over a large region: Kuparuk River Basin, Alaska, USA, *Aretic, Antaretic, and Alpine Research*~~Arct Antarct Alp Res~~, 29, 367-378, 1997.

Niu, F., Luo, J., Lin, Z., Fang, J., and Liu, M.: Thaw-induced slope failures and stability analyses in permafrost regions of the Qinghai-Tibet Plateau, China, *Landslides*, 13, 55-65, 2016.

Oelke, C. and Zhang, T.: Modeling the Active-Layer Depth over the Tibetan Plateau, *Arct Antarct Alp Res*, 39, 714-722, 2007.

Pang, Q., Cheng, G., Li, S., and Zhang, W.: Active layer thickness calculation over the Qinghai-Tibet Plateau, *Cold Reg Sci Technol*, 57, 23-28, 2009.

R Core Team: R: A language and environment for statistical computing., R Foundation for Statistical Computing, Vienna, Austria., 2017.

带格式的: 字体: Calibri

带格式的: 缩进: 左侧: 0 厘米, 首行缩进: 0 字符

带格式的: 字体: Calibri

带格式的: 字体: Calibri

带格式的: 字体: Calibri

带格式的: 字体: Calibri

带格式的: 缩进: 左侧: 0 厘米, 首行缩进: 0 字符

带格式的: 字体: Calibri

- Ran, Y., Li, X., and Cheng, G.: Climate warming over the past half century has led to thermal degradation of permafrost on the Qinghai-Tibet Plateau, *Cryosphere*, 12, 595-608, 2018.

Ran, Y. H., Li, X., Cheng, G. D., Zhang, T. J., Wu, Q. B., Jin, H. J., and Jin, R.: Distribution of Permafrost in China: An Overview of Existing Permafrost Maps, *Permafrost and Periglacial Processes* *Periglac*, 23, 322-333, 2012.

5 Riseborough, D.: Permafrost Modeling. In: Encyclopedia of Snow, Ice and Glaciers, Singh, V. P., Singh, P., and Haritashya, U. K. (Eds.), Springer Netherlands, Dordrecht, 2011.

Riseborough, D., Shiklomanov, N., Etzelmuller, B., Gruber, S., and Marchenko, S.: Recent advances in permafrost modelling, *Permafrost and Periglacial Processes* *Periglac*, 19, 137-156, 2008.

Romanovsky, V. E. and Osterkamp, T. E.: Thawing of the active layer on the coastal plain of the Alaskan Arctic, *Permafrost and Periglacial Processes* *Periglac*, 8, 1-22, 1997.

10 Rui, H. and Beaudoin, H.: Readme document for global land data assimilation system version 2 (GLDAS-2) products, *GES DISC*, 2011. 2011.

Sazonova, T. S. and Romanovsky, V. E.: A model for regional-scale estimation of temporal and spatial variability of active layer thickness and mean annual ground temperatures, *Permafrost and Periglacial Processes* *Periglac*, 14, 125-139, 2003.

15 Shanley, J. B. and Chalmers, A.: The effect of frozen soil on snowmelt runoff at Sleepers River, Vermont, *Hydrol Process*, 13, 1843-1857, 1999.

Shen, M. G., Piao, S. L., Jeong, S. J., Zhou, L. M., Zeng, Z. Z., Ciais, P., Chen, D. L., Huang, M. T., Jin, C. S., Li, L. Z. X., Li, Y., Myneni, R. B., Yang, K., Zhang, G. X., Zhang, Y. J., and Yao, T. D.: Evaporative cooling over the Tibetan Plateau induced by vegetation growth, *PNAS*, 112, 9299-9304, 2015.

20 Smith, M. W. and Riseborough, D. W.: Permafrost monitoring and detection of climate change, *Permafrost and Periglacial Processes* *Periglac*, 7, 301-309, 1996.

Smith, S. L. and Riseborough, D. W.: Modelling the thermal response of permafrost terrain to right-of-way disturbance and climate warming, *Cold Regions Science and Technology* *Reg Sci Technol*, 60, 92-103, 2010.

25 Stow, D., Daeschner, S., Hope, A., Douglas, D., Petersen, A., Myneni, R., Zhou, L., and Oechel, W.: Variability of the seasonally integrated normalized difference vegetation index across the north slope of Alaska in the 1990s, *International Journal of Remote Sensing* *Sens*, 24, 1111-1117, 2003.

Wickham, H., Lawrence, M., Cook, D., Buja, A., Hofmann, H., and Swayne, D. F.: The plumbing of interactive graphics, *Computational Statistics* *Computation Stat*, 24, 207-215, 2009.

30 Wu, Q., Hou, Y., Yun, H., and Liu, Y.: Changes in active-layer thickness and near-surface permafrost between 2002 and 2012 in alpine ecosystems, Qinghai-Xizang (Tibet) Plateau, China, *Geophys. Res. Lett.*, 42, 149-155, 2015.

Wu, Q. B. and Zhang, T. J.: Changes in active layer thickness over the Qinghai-Tibetan Plateau from 1995 to 2007, *Journal of Geophysical Research* *J Geophys Res-Atmos*, 115, 2010.

Wu, Q. B., Zhang, T. J., and Liu, Y. Z.: Permafrost temperatures and thickness on the Qinghai-Tibet Plateau, *Global and Planetary Change* *GPC*, 72, 32-38, 2010.

35 Xie, Y. H.: animation: An R Package for Creating Animations and Demonstrating Statistical Methods, *J Stat Softw*, 53, 1-27,

2013.

Yang, M. X., Nelson, F. E., Shiklomanov, N. I., Guo, D. L., and Wan, G. N.: Permafrost degradation and its environmental effects on the Tibetan Plateau: A review of recent research, *Earth-Sci Rev*, 103, 31-44, 2010.

Yao, T., Pu, J., Lu, A., Wang, Y., and Yu, W.: Recent glacial retreat and its impact on hydrological processes on the tibetan plateau, China, and sorrounding regions, *Aretic, Antaretic, and Alpine ResearchArct Antarct Alp Res*, 39, 642-650, 2007.

Yi, S., Wang, X., Qin, Y., Xiang, B., and Ding, Y.: Responses of alpine grassland on Qinghai-Tibetan plateau to climate warming and permafrost degradation: a modeling perspective, *Environ Res Lett*, 9, 2014a.

Yi, S., Wischnewski, K., Langer, M., Muster, S., and Boike, J.: Freeze/thaw processes in complex permafrost landscapes of northern Siberia simulated using the TEM ecosystem model: impact of thermokarst ponds and lakes, *Geosci Model Dev*, 7, 1671-1689, 2014a2014b.

Yi, S. H., Wang, X. Y., Qin, Y., Xiang, B., and Ding, Y. J.: Responses of alpine grassland on Qinghai-Tibetan plateau to climate warming and permafrost degradation: a modeling perspective, *Environmental Research Letters*, 9, 2014b.

Yi, S. H., Yi, S., Woo, M. K., and Arain, M. A.: Impacts of peat and vegetation on permafrost degradation under climate warming, *Geophysical Research LettersGeophys Res Lett*, 34, 2007.

Yin, G. A., Niu, F. J., Lin, Z. J., Luo, J., and Liu, M. H.: Effects of local factors and climate on permafrost conditions and distribution in Beiluhe basin, Qinghai-Tibet Plateau, China, *Sci Total Environ*, 581, 472-485, 2017.

Zambrano-Bigiarini, M. and Rojas, R.: A model-independent Particle Swarm Optimisation software for model calibration, *Environ Modell Softw*, 43, 5-25, 2013.

Zhang, T., Barry, R. G., Knowles, K., Heginbottom, J. A., and Brown, J.: Statistics and characteristics of permafrost and ground-ice distribution in the Northern Hemisphere, *Polar Geography*, 31, 132-154, 2008a.

Zhang, T., Frauenfeld, O. W., Serreze, M. C., Etringer, A., Oelke, C., McCreight, J., Barry, R. G., Gilichinsky, D., Yang, D., Ye, H., Ling, F., and Chudinova, S.: Spatial and temporal variability in active layer thickness over the Russian Arctic drainage basin, *Journal of Geophysical ResearchJ Geophys Res-Atmos*, 110, 2005.

Zhang, Y., Carey, S. K., and Quinton, W. L.: Evaluation of the algorithms and parameterizations for ground thawing and freezing simulation in permafrost regions, *J Geophys Res-Atmos*, 113, 2008b.

Zhang, Y., Olthof, I., Fraser, R., and Wolfe, S. A.: A new approach to mapping permafrost and change incorporating uncertainties in ground conditions and climate projections, *Cryosphere*, 8, 2253-2253, 2014.

Zhang, Y. S., Carey, S. K., and Quinton, W. L.: Evaluation of the algorithms and parameterizations for ground thawing and freezing simulation in permafrost regions, *J Geophys Res-Atmos*, 113, 2008b.

带格式的: 字体: Calibri

带格式的: 字体: Calibri

带格式的: 缩进: 左侧: 0 厘米, 首行缩进: 0 字符

带格式的: 字体: Calibri

带格式的: 缩进: 左侧: 0 厘米, 首行缩进: 0 字符

带格式的: 字体: Calibri

带格式的: 字体: Calibri

带格式的: 字体: Calibri

带格式的: 缩进: 左侧: 0 厘米, 首行缩进: 0 字符

带格式的: 字体: Calibri

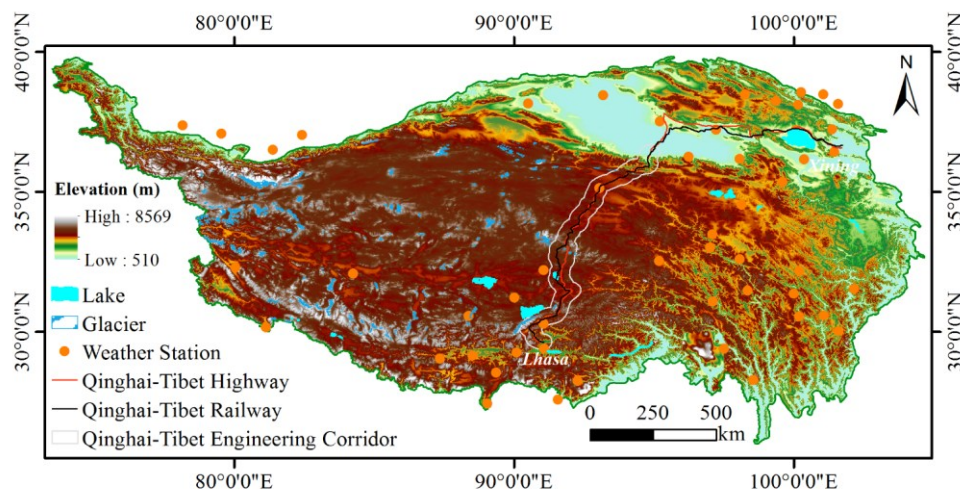

**Figure 1:** Map of the data location over the QTP.

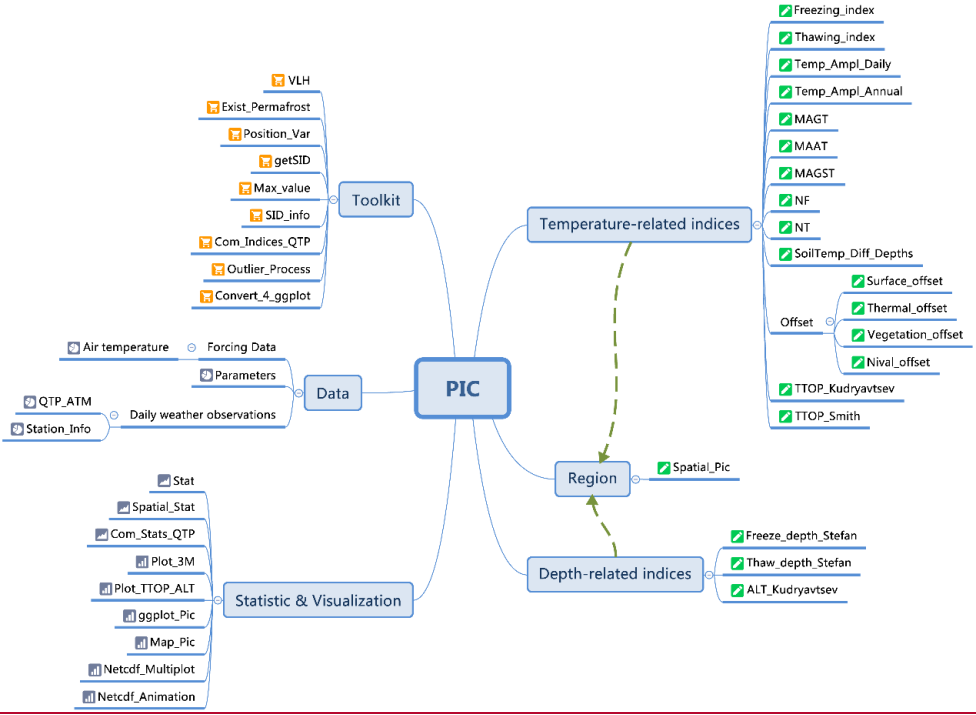

Figure 2: Mind map of the R package PIC v1.2.

Table 1: Most important user functions in the R package PIC v1.2. The equation column of this table corresponds to the equation in Section 2.

| R function                  | Equation | Description                                   | Unit  |
|-----------------------------|----------|-----------------------------------------------|-------|
| Temperature-related indices |          |                                               |       |
| Freezing_index              | (4.6)    | Freezing degree-days for air and ground       | °Cday |
| Thawing_index               | (3.5)    | Thawing degree-days for air and ground        | °Cday |
| MAAT                        | (7)      | Mean annual air temperature                   | °C    |
| MAGST                       | (8)      | Mean annual ground surface temperature (5 cm) | °C    |
| MAGT                        | (10)     | Mean annual ground temperature (at 15 m)      | °C    |

带格式的  
带格式的: 字体: 非加粗

|                                     |            |                                                                                                                                                                                            |                        |
|-------------------------------------|------------|--------------------------------------------------------------------------------------------------------------------------------------------------------------------------------------------|------------------------|
| <u>NT</u>                           | (11)       | <u>Thawing n factor</u>                                                                                                                                                                    |                        |
| <u>NF</u>                           | (12)       | <u>Freezing n factor</u>                                                                                                                                                                   |                        |
| <u>Surface_Offset</u>               |            | <u>The difference between the MAGST and MAAT</u>                                                                                                                                           | <u>°C</u>              |
| <u>Thermal_Offset</u>               |            | <u>The difference between the TTOP and MAGST</u>                                                                                                                                           | <u>°C</u>              |
| <u>Vegetation_Offset</u>            |            | <u>The second term (Surface_Offset) is negative and represents the reduction in MAGST due to vegetation effects in summer (vegetation offset)</u>                                          | <u>°C</u>              |
| <u>Nival_Offset</u>                 |            | <u>The first term (Surface_Offset) on the right-hand-side is positive and represents the elevation of MAGST over MAAT due to the insulating effect of winter snow cover (nival offset)</u> | <u>°C</u>              |
| <u>TTOP_Smith</u>                   | (13)       | <u>The temperature at the top of the permafrost using Smith &amp; Riseborough function</u>                                                                                                 | <u>°C</u>              |
| <u>TTOP_Kudryavtsev</u>             | (14)       | <u>The temperature at the top of the permafrost using Kudryavtsev function</u>                                                                                                             | <u>°C</u>              |
| <b><u>Depth-related indices</u></b> |            |                                                                                                                                                                                            |                        |
| <u>Freeze_depth_Stefan</u>          | (20)       | <u>Maximum freezing depth using Stefan function</u>                                                                                                                                        | <u>m</u>               |
| <u>Thaw_depth_Stefan</u>            | (16)       | <u>Active layer thickness using Stefan function</u>                                                                                                                                        | <u>m</u>               |
| <u>ALT_Kudryavtsev</u>              | (19)       | <u>Active layer thickness (ALT) or maximum thawing depth using Kudryavtsev function</u>                                                                                                    | <u>m</u>               |
| <b><u>Region</u></b>                |            |                                                                                                                                                                                            |                        |
| <u>Spatial_Pic</u>                  | (3,4,7,16) | <u>Spatial changes with MAAT, DDT<sub>a</sub>, DDF<sub>a</sub> and ALT</u>                                                                                                                 | <u>m</u>               |
| <b><u>Toolkit</u></b>               |            |                                                                                                                                                                                            |                        |
| <u>Com_Indices_QTP</u>              | —          | <u>Computing all indices for all stations of the QTP</u>                                                                                                                                   | —                      |
| <u>Outlier_Process</u>              |            | <u>Process the abnormal value</u>                                                                                                                                                          |                        |
| <u>VLH</u>                          | (2)        | <u>Computing volumetric latent heat of fusion</u>                                                                                                                                          | <u>J/m<sup>3</sup></u> |
| <u>Convert_4_ggplot</u>             |            | <u>Convert the values of TTOP &amp; ALT to one column</u>                                                                                                                                  |                        |
| <u>Exist_Permafrost</u>             |            | <u>To determine the stations where permafrost exist by TTOP values</u>                                                                                                                     |                        |
| <b><u>Statistic</u></b>             |            |                                                                                                                                                                                            |                        |
| <u>Stat</u>                         | (21,22,23) | <u>Statistical functions with 10 more methods</u>                                                                                                                                          | —                      |
| <u>Spatial_Stat</u>                 | (24)       | <u>Spatial statistical method, just for spatial trend</u>                                                                                                                                  |                        |
| <u>Com_Stats_QTP</u>                |            | <u>Computing the statistical values for one or both of these indices</u>                                                                                                                   |                        |
| <b><u>Visualization</u></b>         |            |                                                                                                                                                                                            |                        |
|                                     | —          | —                                                                                                                                                                                          | —                      |

|                                  |                                                                                          |
|----------------------------------|------------------------------------------------------------------------------------------|
| <a href="#">Plot_3M</a>          | <a href="#">Plot MAAT, MAGST, and MAGT for all stations or a single station</a>          |
| <a href="#">Plot_TTOP_ALT</a>    | <a href="#">Plot TTOP and ALT for all stations or a station</a>                          |
| <a href="#">ggplot_Pic</a>       | <a href="#">Plot multiple indices for all stations or a single station using ggplot2</a> |
| <a href="#">Map_Pic</a>          | <a href="#">Plot multiple indices for all stations or a single station using ggmap</a>   |
| <a href="#">Netcdf_Multiplot</a> | <a href="#">Regional visualization of NetCDF with multiple plots</a>                     |
| <a href="#">Netcdf_Animation</a> | <a href="#">Regional animation of NetCDF</a>                                             |

**Table 2:** Input data and parameters.

| Variables   | Meaning                                                | Unit                   |
|-------------|--------------------------------------------------------|------------------------|
| Temperature | Daily mean air temperature                             | $^{\circ}\text{C}$     |
| Tmax        | Daily maximum air temperature                          | $^{\circ}\text{C}$     |
| Tmin        | Daily Minimum air temperature                          | $^{\circ}\text{C}$     |
| GT          | Daily mean ground temperature in 0 cm                  | $^{\circ}\text{C}$     |
| GT_0_MAX    | Daily maximum ground temperature at 0 cm               | $^{\circ}\text{C}$     |
| GT_0_MIN    | Daily minimum ground temperature at 0 cm               | $^{\circ}\text{C}$     |
| temp        | Spatial daily mean air temperature                     | $^{\circ}\text{C}$     |
| $\lambda_t$ | Thermal conductivity of ground in thawed state         | $\text{W/m}^2\text{C}$ |
| $\lambda_f$ | Thermal conductivity of ground in frozen state         | $\text{W/m}^2\text{C}$ |
| L           | Latent heat of fusion                                  | $\text{J/m}^3$         |
| $\rho$      | Dry bulk density                                       | $\text{kg/m}^3$        |
| W           | Soil water content in thawed state                     | %                      |
| $W_u$       | Soil unfrozen water content in frozen state            | %                      |
| $P_{sn}$    | period of the temperature wave, adjusted for snow melt | s                      |
| $C_T$       | volumetric heat capacity during thawing                | $\text{J/m}^3$         |

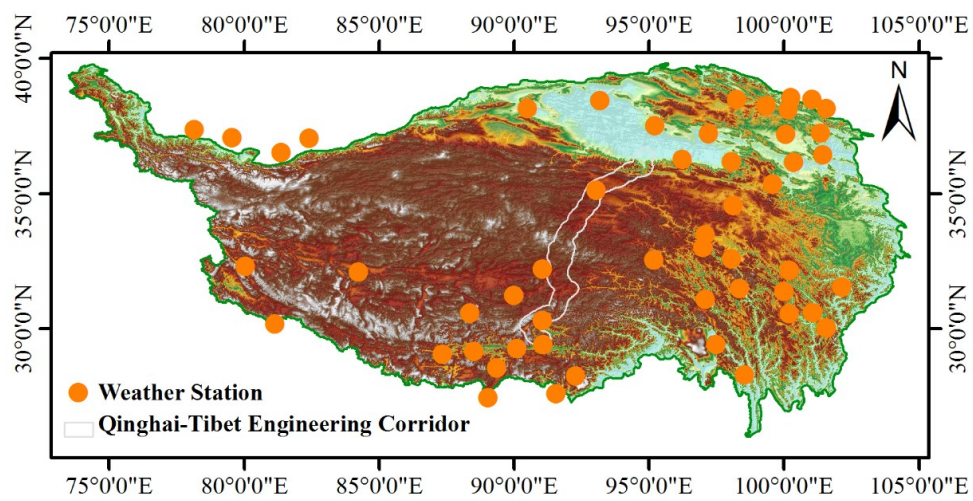

**Figure 1:** Map of the data location over QTP.



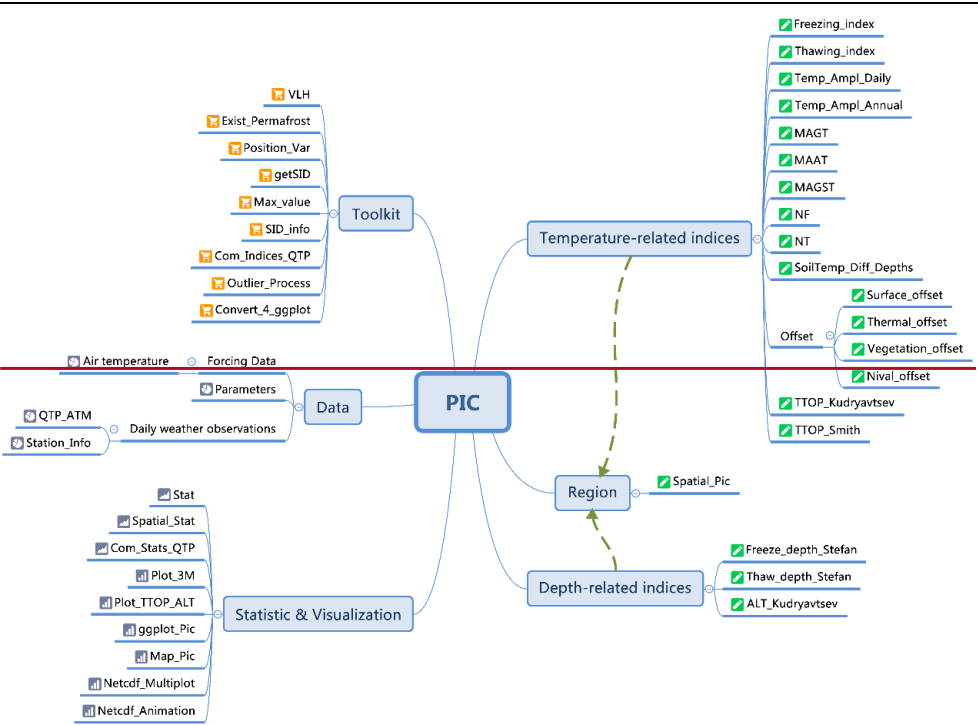

Figure 2: Mind map of the R-package PIC.

Table 2: Most important user functions in the R-package PIC. The equation of this table corresponds to the equation in Section 2.2.

Table 3: Parameters of thermal conductivity in the thawed/frozen state. The UADS Code came from soil texture classification of United States Department of Agriculture (USDA). The Qinghai-Tibet Plateau does not have the 1 and 8 of soil classification codes.  $\theta$ : soil water content;  $K_s$ : thermal conductivity of soil solid in thawed state;  $K_f$ : thermal conductivity of soil solid in frozen state.

| R-function       | Description and reference | Unit | Equation | $K_s$ | $K_f$ |
|------------------|---------------------------|------|----------|-------|-------|
| <u>USDA Code</u> | <u>Soil</u>               |      |          |       |       |

- 带格式的: 字体: (默认) 楷体, 字体颜色: 文字 1
- 带格式的: 字体颜色: 文字 1
- 带格式的: 居中, 无孤行控制
- 带格式表格
- 插入的单元格
- 带格式的: 字体颜色: 文字 1

|                             | Texture          |             |           |          |
|-----------------------------|------------------|-------------|-----------|----------|
| Temperature-related indices | —clay(heavy)     | —0.17       | 1.90      | 0.85     |
| 1                           |                  |             |           |          |
| 2                           | silty clay       | 0.17        | 1.90      | 0.85     |
| 3                           | clay (light)     | 0.17        | 1.90      | 0.85     |
| Freezing_index4             | Freezing         | —0.17       | (4,6)1.90 | 0.85     |
|                             | degree-days for  |             |           |          |
|                             | air and          |             |           |          |
|                             | groundsilty clay |             |           |          |
|                             | loam             |             |           |          |
| Thawing_index5              | Thawing          | —0.17       | (3,5)1.90 | 0.85     |
|                             | degree-days for  |             |           |          |
|                             | air and          |             |           |          |
|                             | groundclay       |             |           |          |
|                             | loam             |             |           |          |
| 6                           | silt             | 0.17        | 1.90      | 0.85     |
| MAAT7                       | Mean annual air  | —0.17       | (7)1.90   | 0.85     |
|                             | temperaturesilt  |             |           |          |
|                             | loam             |             |           |          |
| MAGST8                      | Mean annual      | —0.15       | (8)3.55   | 0.85     |
|                             | ground-surface   |             |           |          |
|                             | temperature (5-  |             |           |          |
|                             | em)sandy clay    |             |           |          |
| 9                           | loam             | 0.15        | 3.55      | 0.95     |
| MAGT10                      | sandy clay loam  | Mean        | —3.55     | (10)0.95 |
|                             |                  | annual      |           |          |
|                             |                  | ground—     |           |          |
|                             |                  | temperature |           |          |
|                             |                  | (at 15-     |           |          |
|                             |                  | m)0.15      |           |          |
| NF11                        | Thawing n-       | 0.15        | (11)3.55  | 0.95     |
|                             | factorsandy      |             |           |          |
|                             | loam             |             |           |          |
| NF12                        | Freezing n-      | 0.06        | (12)4.60  | 1.70     |

| factorloamy<br>sand   |                                                                                                                                                                                      |                  |                    |
|-----------------------|--------------------------------------------------------------------------------------------------------------------------------------------------------------------------------------|------------------|--------------------|
| Surface_Offset        | The difference between the MAGST and MAAT                                                                                                                                            | ℃                |                    |
| Thermal_Offset        | The difference between the TTOP and MAGST                                                                                                                                            | ℃                |                    |
| Vegetation_Offset     | The second term (Surface_Offset) is negative, and represents the reduction in MAGST due to vegetation effects in summer (vegetation offset)                                          | ℃                |                    |
|                       | The first term (Surface_Offset) on the right hand side is positive, and represents the elevation of MAGST over MAAT due to the insulating effect of winter snow cover (nival offset) | ℃                |                    |
| Nival_Offset          |                                                                                                                                                                                      | ℃                |                    |
| TTOP_Smith13          | The temperature at the top of the permafrost using Smith & Riseborough functions                                                                                                     | ℃                | 0.06 (13)4.60 1.70 |
| TTOP_Kudryavtsev      | The temperature at the top of the permafrost using Kudryavtsev function                                                                                                              | ℃                | (14)               |
| Depth-related indices |                                                                                                                                                                                      |                  |                    |
| Freeze_depth_Stefan   | Maximum freezing depth using Stefan function                                                                                                                                         | m                | (20)               |
| Thaw_depth_Stefan     | Active layer thickness using Stefan function                                                                                                                                         | m                | (16)               |
| ALT_Kudryavtsev       | Active layer thickness (ALT) or maximum thawing depth using Kudryavtsev function                                                                                                     | m                | (19)               |
| Region                |                                                                                                                                                                                      |                  |                    |
| Spatial_Pie           | Spatial changes with MAAT, DDT <sub>s</sub> , DDF <sub>s</sub> and ALT                                                                                                               | m                | (3,4,7,16)         |
| Toolkit               |                                                                                                                                                                                      |                  |                    |
| Com_Indices_QTP       | Computing all indices for all stations of the QTP                                                                                                                                    |                  |                    |
| Outlier_Proceess      | Process the abnormal value                                                                                                                                                           |                  |                    |
| VLH                   | Computing volumetric latent heat of fusion                                                                                                                                           | J/m <sup>3</sup> | (2)                |
| Convert_4_ggplot      | Convert the values of TTOP & ALT to one columns                                                                                                                                      |                  |                    |
| Exist_Permafrost      | To determine which stations exists permafrost by TTOP values                                                                                                                         |                  |                    |
| Statistic             |                                                                                                                                                                                      |                  |                    |
| Stat                  | Statistic functions with more 10 methods                                                                                                                                             |                  | (21,22,23)         |

带格式的: 字体颜色: 文字 1

插入的单元格

带格式的: 居中, 无弧形控制

带格式的: 字体颜色: 文字 1

带格式的: 字体颜色: 文字 1

带格式表格

带格式的: 字体颜色: 文字 1

带格式的: 字体颜色: 文字 1

|                  |                                                                |      |
|------------------|----------------------------------------------------------------|------|
| Spatial_Stat     | Spatial statistic method, just for spatial trend               | (24) |
| Com_Stats_QTP    | Computing the statiste values for one or both of these indiees |      |
| Visualization    | —                                                              | —    |
| Plot_3M          | Plot MAAT, MAGST, and MAGT for all stations or a station       |      |
| Plot_TTOP_ALT    | Plot TTOP and ALT for all stations or a station                |      |
| ggplot_Pie       | Plot multiple indices all stations or a station using ggplot2  |      |
| Map_Pie          | Plot multiple indices all stations or a station using ggmap    |      |
| Netedf_Multiplot | Region visualization of NetCDF with multiple plots             |      |
| Netedf_Animation | Region animation of NetCDF                                     | —    |

带格式的: 字体: 小四, 字体颜色: 文字 1

带格式的: 两端对齐, 行距: 单倍行距

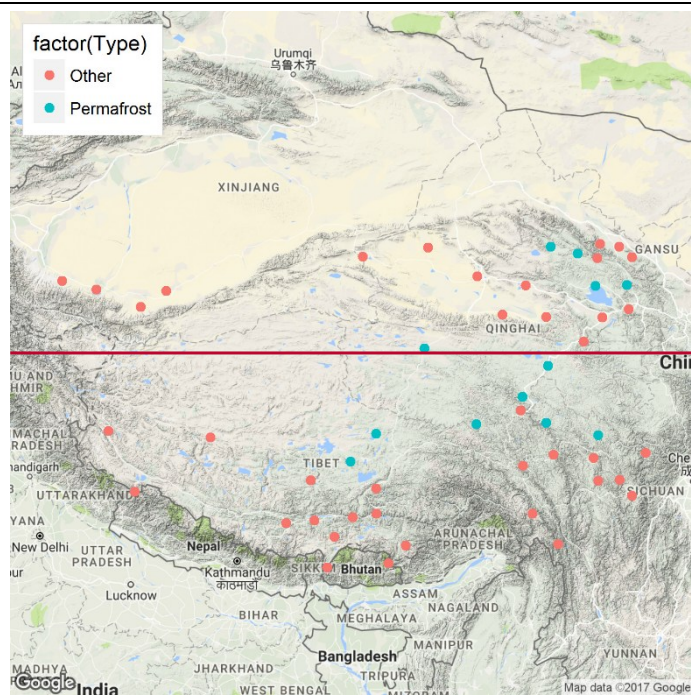

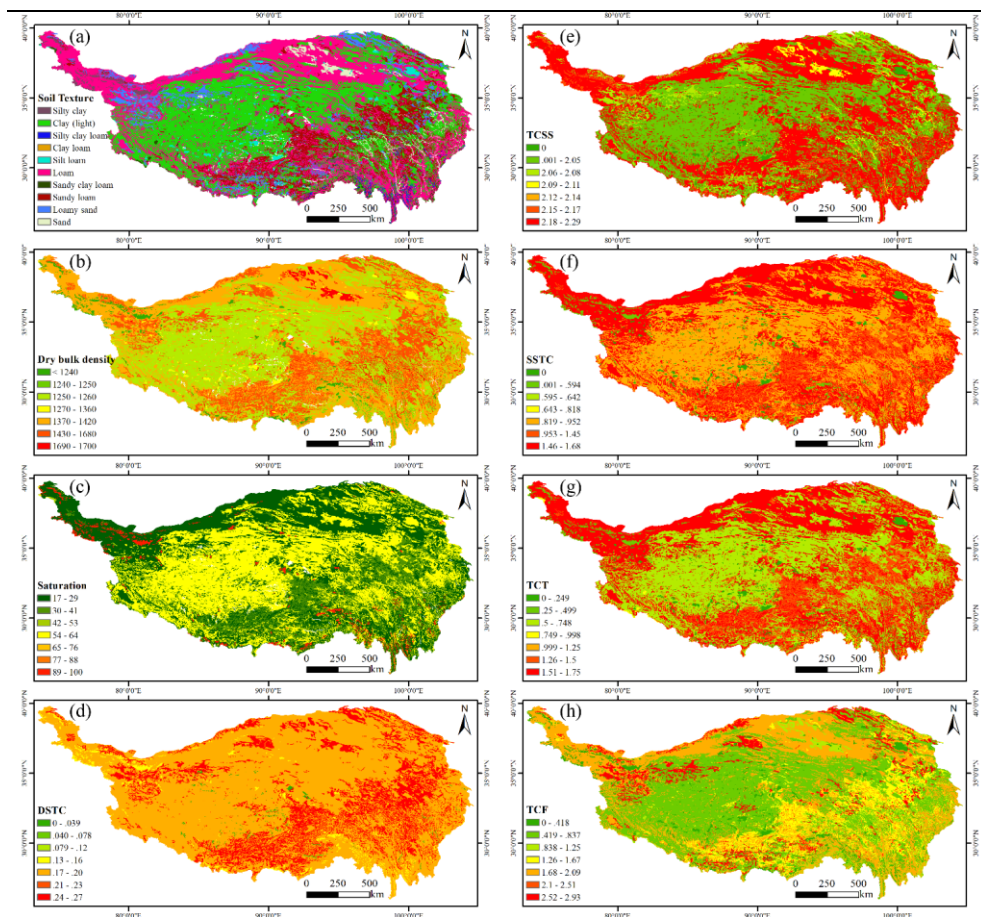

**Figure 3:** Spatial parameters for PIC v1.2 over the Qinghai-Tibet Plateau. (a) soil texture classification based on HWS data; (b) dry bulk density  $\rho$ ; (c) soil saturated water content  $\theta_s$ ; (d) thermal conductivity of dry soil  $\lambda_{dry}$ ; (e) thermal conductivity of soil solids  $\lambda_s$ ; (f) saturated soil thermal conductivity  $\lambda_{sat}$ ; (g) thermal conductivity of ground in thawed state  $\lambda_t$ ; (h) thermal conductivity of ground in frozen state  $\lambda_f$ .

带格式的: 字体颜色: 自动设置

带格式的: 字体: 加粗, 字体颜色: 自动设置

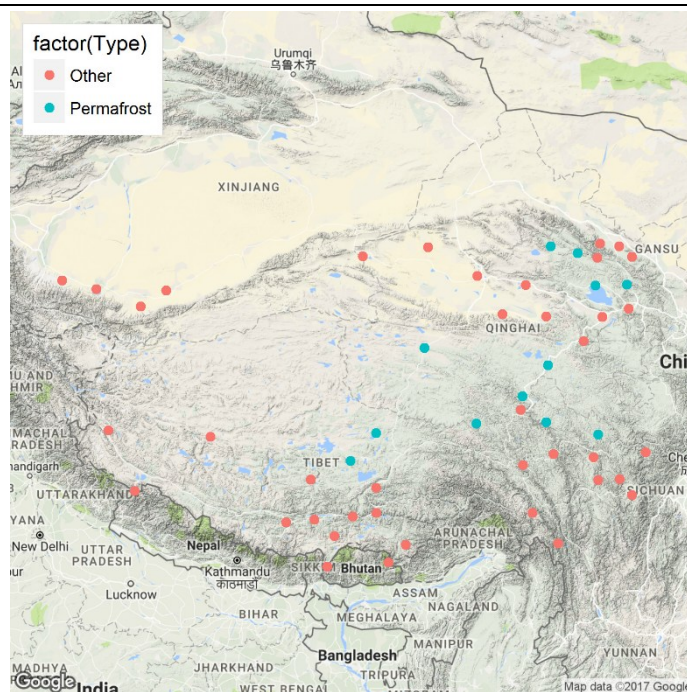

**Figure 4:** Permafrost occurrence map. Google Maps is as a base map that uses the Exist\_Permafrost function. “Other” indicates the seasonal frozen soil.

**Table 34:** The statistical values of TTOP apply Com\_Stats\_QTP for the stations where permafrost exists. SD\_S is Intercept: y-intercept; Slope: slope of regression line; R: Pearson's correlation coefficient, R<sup>2</sup>: coefficient of determination; RMSE: root mean squared error; NRMSE: normalized RMSE; SD\_S: the standard deviation of TTOP that uses using the Stefan function; whereas; SD\_K is: the standard deviation of TTOP that uses using the Kudryavtsev function-; MEF: modelling efficiency; NAE: normalized average error; VR: variance ratio; PBIAS: percent bias; NSE: Nash-Sutcliffe efficiency; RSR: RMSE-observations standard deviation ratio; and D: index of agreement.

| Statistic                 | Tuole | Wudaoliang | Anduo | Maduo | Qingshuihe | Shiqu |
|---------------------------|-------|------------|-------|-------|------------|-------|
| <u>interceptIntercept</u> | -0.69 | -0.4       | -0.59 | -0.9  | -1.24      | -1.47 |

|                        |        |        |         |        |        |         |
|------------------------|--------|--------|---------|--------|--------|---------|
| <del>slope</del> Slope | 1.11   | 1.16   | 1.2     | 1.19   | 0.93   | 0.89    |
| R                      | 0.97   | 0.96   | 0.97    | 0.97   | 0.96   | 0.86    |
| R <sup>2</sup>         | 0.94   | 0.92   | 0.93    | 0.94   | 0.92   | 0.75    |
| RMSE                   | 0.83   | 0.86   | 0.83    | 1.24   | 1.06   | 1.5     |
| NRMSE                  | -0.85  | -0.34  | -1.23   | -0.78  | -0.52  | -3.17   |
| SD_S                   | 0.59   | 0.8    | 0.78    | 0.61   | 1      | 0.69    |
| SD_K                   | 0.6    | 0.66   | 0.78    | 0.66   | 0.6    | 0.69    |
| MEF                    | -0.85  | 0.03   | -0.06   | -2.7   | 0.07   | -3.09   |
| NAE                    | 0.89   | 0.39   | 1.38    | 0.86   | 0.65   | 3.35    |
| VR                     | 1.03   | 0.68   | 1       | 1.14   | 0.35   | 1       |
| PBIAS                  | -76.13 | -26.54 | -108.59 | -67.31 | -41.42 | -255.56 |
| <del>MSENSE</del>      | 0.42   | 0.62   | 0.57    | 0.39   | 0.67   | 0.37    |
| RSR                    | 0.76   | 0.61   | 0.66    | 0.78   | 0.58   | 0.79    |
| D                      | 0.67   | 0.7    | 0.76    | 0.53   | 0.58   | 0.5     |

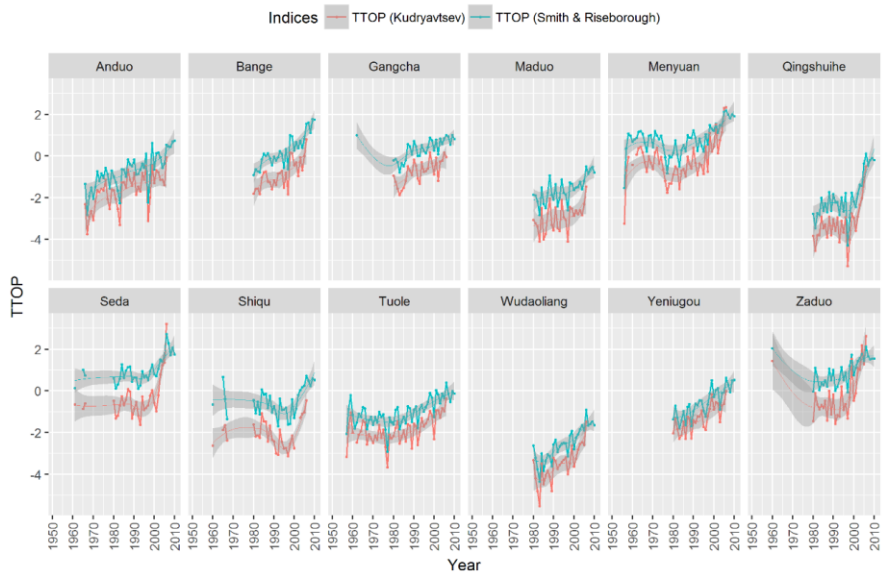



**Figure 45:** TTOP that uses using the Smith and Kudryavtsev functions.

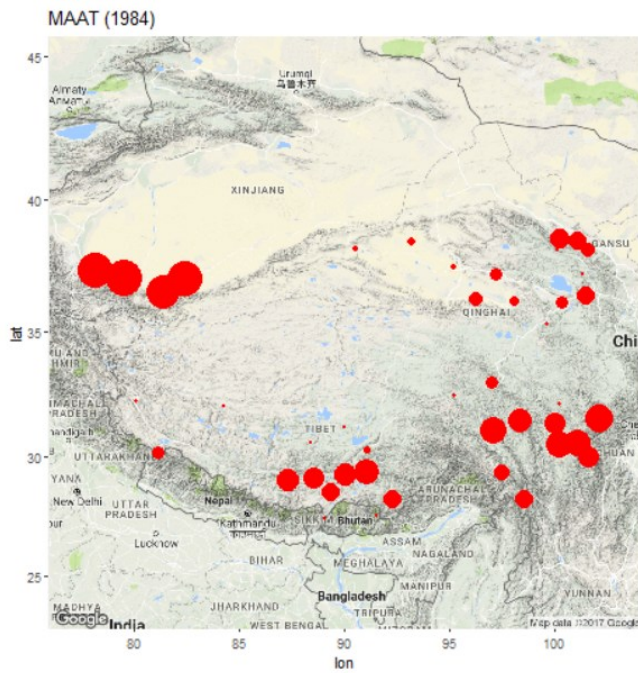

**Figure 56:** Index changes over time for MAAT. These graphs are animated in GIF mode.

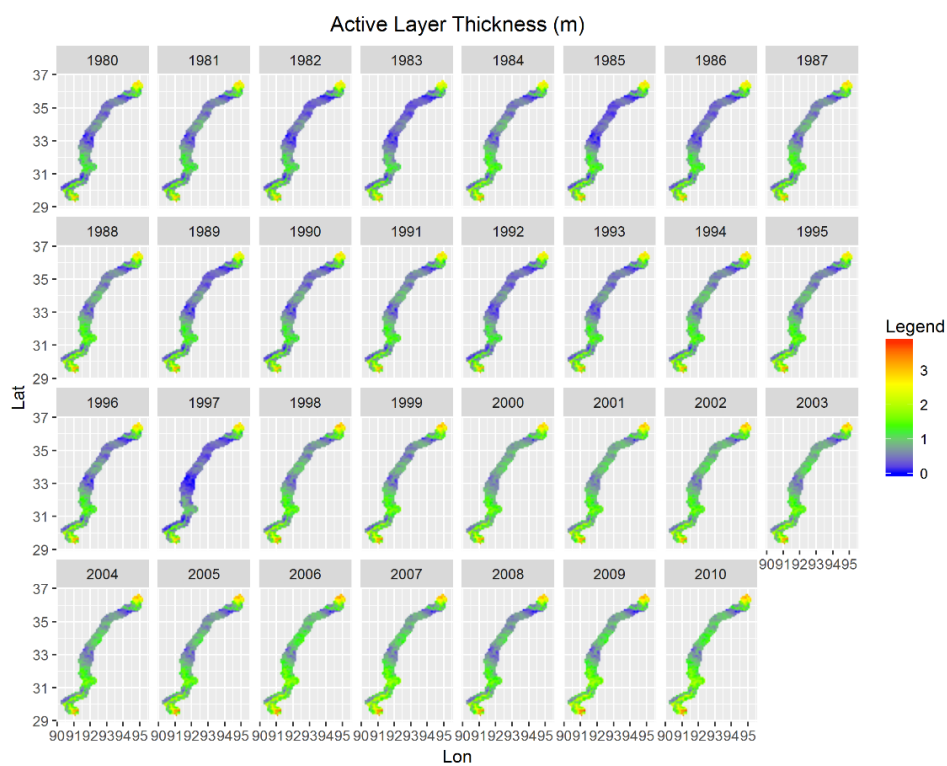

**Figure 67:** Regional visualization of ALT.

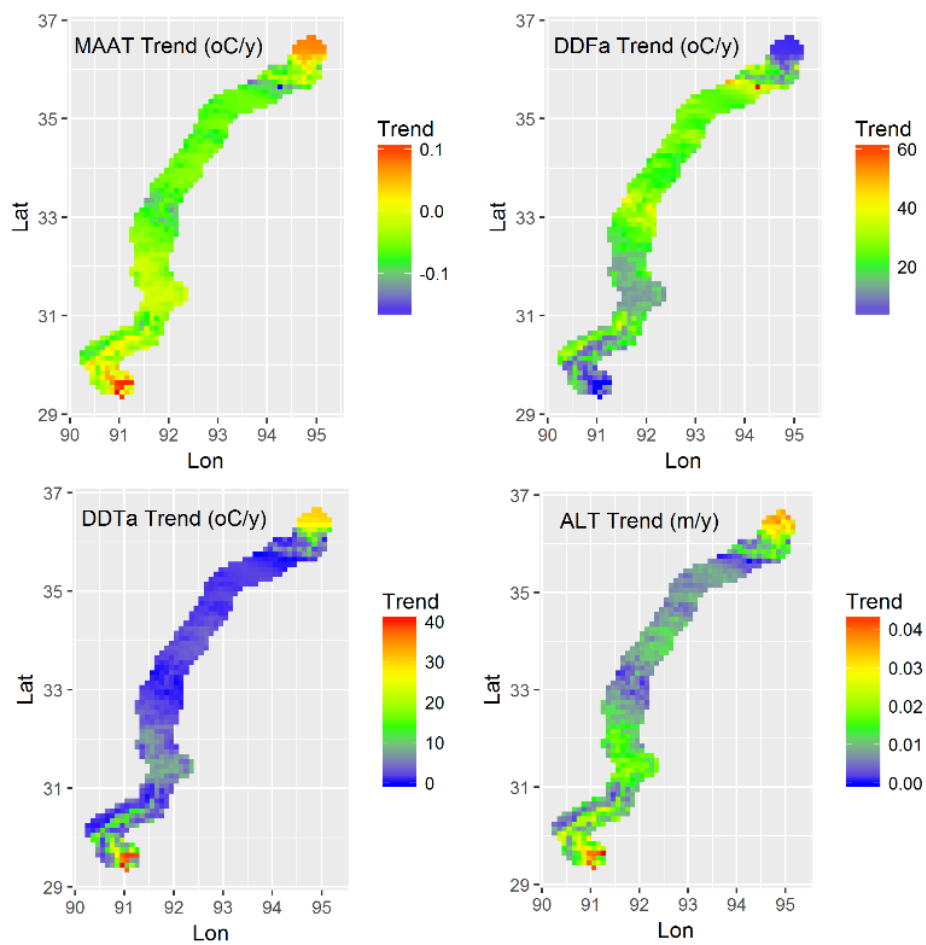

**Figure 78:** Spatial trend of MAAT,  $DDT_a$ ,  $DDF_a$ , and ALT.

**Table 5.** The active layer thickness (ALT) and its trend between the PIC v1.2 simulation and literature analysis in the Qinghai-

| Tibet Engineering Corridor (QTEC).      |                                          |                                                              |                  |                                                                                                        |                                         |
|-----------------------------------------|------------------------------------------|--------------------------------------------------------------|------------------|--------------------------------------------------------------------------------------------------------|-----------------------------------------|
| <u>Mean</u><br><u>ALT</u><br><u>(m)</u> | <u>ALT</u><br><u>Scope</u><br><u>(m)</u> | <u>ALT trend</u><br><u>(cm yr<sup>-1</sup>)</u>              | <u>Period</u>    | <u>Location</u>                                                                                        | <u>Data sources</u>                     |
| <u>2.03</u>                             | <u>0.97-3.87</u>                         | <u>2.89</u>                                                  | <u>1980-2010</u> | <u>The whole QTEC</u>                                                                                  | <u>PIC v1.2</u>                         |
| <u>2.18</u>                             | <u>1.00-3.20</u>                         | <u>1.33</u>                                                  | <u>1981-2010</u> | <u>Near the Qinghai-Tibet highway</u><br><u>along the QTEC</u>                                         | <u>Li et al.</u><br><u>(2012)</u>       |
| <u>==</u>                               | <u>1.00-3.00</u>                         | <u>0.50-2.00;</u><br><u>3.00-5.00</u><br><u>(1990s-2001)</u> | <u>1980-2001</u> | <u>Simulation along the Qinghai-Tibet</u><br><u>Highway/</u><br><u>Railway</u>                         | <u>Oelke and</u><br><u>Zhang (2007)</u> |
| <u>==</u>                               | <u>1.30-3.50</u>                         | <u>==</u>                                                    | <u>==</u>        | <u>Near the Qinghai-Tibet highway</u><br><u>along the QTEC</u>                                         | <u>Pang et al.</u><br><u>(2009)</u>     |
| <u>==</u>                               | <u>2.00-2.60</u>                         | <u>2.14-7.14</u>                                             | <u>1991-1997</u> | <u>1 site (35°43'N, 94°05'E) Near the</u><br><u>Qinghai-Tibet highway along the</u><br><u>QTEC</u>     | <u>Cheng and Wu</u><br><u>(2007a)</u>   |
| <u>==</u>                               | <u>1.84-3.07</u>                         | <u>==</u>                                                    | <u>1990s</u>     | <u>17 Monitoring sites near the Qinghai-</u><br><u>Tibet Highway/</u><br><u>Railway along the QTEC</u> | <u>Jin et al.</u><br><u>(2008)</u>      |
| <u>2.41</u>                             | <u>1.32-4.57</u>                         | <u>7.50</u>                                                  | <u>1995-2007</u> | <u>10 Monitoring sites Near the</u><br><u>Qinghai-Tibet highway along the</u><br><u>QTEC</u>           | <u>Wu and Zhang</u><br><u>(2010)</u>    |
| <u>2.40</u>                             | <u>1.61-3.38</u>                         | <u>4.26</u>                                                  | <u>2002-2012</u> | <u>10 Monitoring sites (34°49'N,</u><br><u>92°55'E) along the QTEC</u>                                 | <u>Wu et al.</u><br><u>(2015)</u>       |

带格式的: 英语(英国)
